# Supplementary material for: Placebo response in trials with patients with anxiety, obsessive-compulsive and stress disorders across the lifespan: a three-level meta-analysis
Source: HighWire-hosted journal article supplement (doi:10.1136/bmjment-2022-300630), 2023-02-01

**Placebo response in trials with anxiety, obsessive-compulsive, and stress disorders patients across the lifespan: A three-level meta-analysis.**

**S1 Appendix**

Content

**S1 Table A:** Preferred Reporting Items for Systematic Reviews and Network Meta-Analyses checklist (pg. 2)

**S1 Text A:** Search terms (pg. 5)

**S1 Table B:** Remission and response definitions in primary studies (pg. 6)

**S1 Fig. A:** Flowchart of included and excluded studies (pg. 12)

**S1 Table C:** Studies general information (pg. 13)

**S1 Table D:** Studies demographic information (pg. 26)

**S1 Table E:** Intervention information (pg. 33)

**S1 Table F:** Outcomes assessment information (pg. 41)

**S1 Table G:** Multiple multilevel meta-regression model for placebo response on the aggregate measure of internalizing symptoms in adults (pg. 54)

**S1 Table H:** Multiple multilevel meta-regression model for placebo response on the aggregate measure of internalizing symptoms in adults and elderly (pg. 56)

**S1 Table I:** Multiple multilevel meta-regression model for placebo response on the aggregate measure of internalizing symptoms in elderly (pg. 58)

**S1 Table J:** Multiple multilevel meta-regression model for placebo response on the aggregate measure of internalizing symptoms in children and adolescents (pg. 59)

**S1 Table K:** Risk of bias in included studies (pg. 60)

**S1 Fig. B:** Risk of bias summary (pg. 65)

**S1 Fig. C:** Funnel plot for all internalizing symptoms (pg. 66)

**S1 Table A:** Preferred Reporting Items for Systematic Reviews and Network Meta-Analyses checklist

| Section and Topic             | Item # | Checklist item                                                                                                                                                                                                                                                                                       | Location where item is reported |
|-------------------------------|--------|------------------------------------------------------------------------------------------------------------------------------------------------------------------------------------------------------------------------------------------------------------------------------------------------------|---------------------------------|
| <b>TITLE</b>                  |        |                                                                                                                                                                                                                                                                                                      |                                 |
| Title                         | 1      | Identify the report as a systematic review.                                                                                                                                                                                                                                                          | Pg.1                            |
| <b>ABSTRACT</b>               |        |                                                                                                                                                                                                                                                                                                      |                                 |
| Abstract                      | 2      | See the PRISMA 2020 for Abstracts checklist.                                                                                                                                                                                                                                                         | Pg.3                            |
| <b>INTRODUCTION</b>           |        |                                                                                                                                                                                                                                                                                                      |                                 |
| Rationale                     | 3      | Describe the rationale for the review in the context of existing knowledge.                                                                                                                                                                                                                          | Pgs. 5, 6                       |
| Objectives                    | 4      | Provide an explicit statement of the objective(s) or question(s) the review addresses.                                                                                                                                                                                                               | Pg. 7                           |
| <b>METHODS</b>                |        |                                                                                                                                                                                                                                                                                                      |                                 |
| Eligibility criteria          | 5      | Specify the inclusion and exclusion criteria for the review and how studies were grouped for the syntheses.                                                                                                                                                                                          | Pg. 7                           |
| Information sources           | 6      | Specify all databases, registers, websites, organisations, reference lists and other sources searched or consulted to identify studies. Specify the date when each source was last searched or consulted.                                                                                            | Pg. 8                           |
| Search strategy               | 7      | Present the full search strategies for all databases, registers and websites, including any filters and limits used.                                                                                                                                                                                 | S1 Text A                       |
| Selection process             | 8      | Specify the methods used to decide whether a study met the inclusion criteria of the review, including how many reviewers screened each record and each report retrieved, whether they worked independently, and if applicable, details of automation tools used in the process.                     | Pgs. 8, 9                       |
| Data collection process       | 9      | Specify the methods used to collect data from reports, including how many reviewers collected data from each report, whether they worked independently, any processes for obtaining or confirming data from study investigators, and if applicable, details of automation tools used in the process. | Pg. 10                          |
| Data items                    | 10a    | List and define all outcomes for which data were sought. Specify whether all results that were compatible with each outcome domain in each study were sought (e.g. for all measures, time points, analyses), and if not, the methods used to decide which results to collect.                        | Pg. 9                           |
|                               | 10b    | List and define all other variables for which data were sought (e.g. participant and intervention characteristics, funding sources). Describe any assumptions made about any missing or unclear information.                                                                                         | Pg. 9                           |
| Study risk of bias assessment | 11     | Specify the methods used to assess risk of bias in the included studies, including details of the tool(s) used, how many reviewers assessed each study and whether they worked independently, and if applicable, details of automation tools used in the process.                                    | Pg. 9                           |
| Effect measures               | 12     | Specify for each outcome the effect measure(s) (e.g. risk ratio, mean difference) used in the synthesis or presentation of results.                                                                                                                                                                  | Pg. 10                          |
| Synthesis methods             | 13a    | Describe the processes used to decide which studies were eligible for each synthesis (e.g. tabulating the study intervention characteristics and comparing against the planned groups for each synthesis (item #5)).                                                                                 | Pg. 10                          |
|                               | 13b    | Describe any methods required to prepare the data for presentation or synthesis, such as handling of missing summary statistics, or data conversions.                                                                                                                                                | Pg. 10                          |
|                               | 13c    | Describe any methods used to tabulate or visually display results of individual studies and syntheses.                                                                                                                                                                                               | Pg. 10                          |
|                               | 13d    | Describe any methods used to synthesize results and provide a rationale for the choice(s). If meta-analysis was performed, describe the model(s), method(s) to identify the presence and extent of statistical heterogeneity, and software package(s) used.                                          | Pgs. 10, 11                     |

| Section and Topic             | Item # | Checklist item                                                                                                                                                                                                                                                                       | Location where item is reported |
|-------------------------------|--------|--------------------------------------------------------------------------------------------------------------------------------------------------------------------------------------------------------------------------------------------------------------------------------------|---------------------------------|
|                               | 13e    | Describe any methods used to explore possible causes of heterogeneity among study results (e.g. subgroup analysis, meta-regression).                                                                                                                                                 | Pgs. 10, 11                     |
|                               | 13f    | Describe any sensitivity analyses conducted to assess robustness of the synthesized results.                                                                                                                                                                                         | Pgs. 10, 11                     |
| Reporting bias assessment     | 14     | Describe any methods used to assess risk of bias due to missing results in a synthesis (arising from reporting biases).                                                                                                                                                              | Pg. 10                          |
| Certainty assessment          | 15     | Describe any methods used to assess certainty (or confidence) in the body of evidence for an outcome.                                                                                                                                                                                | Pg. 10                          |
| <b>RESULTS</b>                |        |                                                                                                                                                                                                                                                                                      |                                 |
| Study selection               | 16a    | Describe the results of the search and selection process, from the number of records identified in the search to the number of studies included in the review, ideally using a flow diagram.                                                                                         | S1 Fig. A                       |
|                               | 16b    | Cite studies that might appear to meet the inclusion criteria, but which were excluded, and explain why they were excluded.                                                                                                                                                          | Pg. 11                          |
| Study characteristics         | 17     | Cite each included study and present its characteristics.                                                                                                                                                                                                                            | S1 Table C, D, E and F          |
| Risk of bias in studies       | 18     | Present assessments of risk of bias for each included study.                                                                                                                                                                                                                         | S1 Table K                      |
| Results of individual studies | 19     | For all outcomes, present, for each study: (a) summary statistics for each group (where appropriate) and (b) an effect estimate and its precision (e.g. confidence/credible interval), ideally using structured tables or plots.                                                     | Fig 1                           |
| Results of syntheses          | 20a    | For each synthesis, briefly summarise the characteristics and risk of bias among contributing studies.                                                                                                                                                                               | S1 Fig. B                       |
|                               | 20b    | Present results of all statistical syntheses conducted. If meta-analysis was done, present for each the summary estimate and its precision (e.g. confidence/credible interval) and measures of statistical heterogeneity. If comparing groups, describe the direction of the effect. | Tables 1-3                      |
|                               | 20c    | Present results of all investigations of possible causes of heterogeneity among study results.                                                                                                                                                                                       | Pg. 14                          |
|                               | 20d    | Present results of all sensitivity analyses conducted to assess the robustness of the synthesized results.                                                                                                                                                                           | Tables 1-2                      |
| Reporting biases              | 21     | Present assessments of risk of bias due to missing results (arising from reporting biases) for each synthesis assessed.                                                                                                                                                              | S1 Fig C                        |
| Certainty of evidence         | 22     | Present assessments of certainty (or confidence) in the body of evidence for each outcome assessed.                                                                                                                                                                                  | Pg. 15                          |
| <b>DISCUSSION</b>             |        |                                                                                                                                                                                                                                                                                      |                                 |
| Discussion                    | 23a    | Provide a general interpretation of the results in the context of other evidence.                                                                                                                                                                                                    | Pg. 15                          |
|                               | 23b    | Discuss any limitations of the evidence included in the review.                                                                                                                                                                                                                      | Pgs. 18                         |
|                               | 23c    | Discuss any limitations of the review processes used.                                                                                                                                                                                                                                | Pg. 18-19                       |
|                               | 23d    | Discuss implications of the results for practice, policy, and future research.                                                                                                                                                                                                       | Pg. 19                          |
| <b>OTHER INFORMATION</b>      |        |                                                                                                                                                                                                                                                                                      |                                 |
| Registration and protocol     | 24a    | Provide registration information for the review, including register name and registration number, or state that the review was not registered.                                                                                                                                       | Pg. 7                           |
|                               | 24b    | Indicate where the review protocol can be accessed, or state that a protocol was not prepared.                                                                                                                                                                                       | Pg. 7                           |
|                               | 24c    | Describe and explain any amendments to information provided at registration or in the protocol.                                                                                                                                                                                      | Pg. 7                           |

| Section and Topic                              | Item # | Checklist item                                                                                                                                                                                                                             | Location where item is reported |
|------------------------------------------------|--------|--------------------------------------------------------------------------------------------------------------------------------------------------------------------------------------------------------------------------------------------|---------------------------------|
| Support                                        | 25     | Describe sources of financial or non-financial support for the review, and the role of the funders or sponsors in the review.                                                                                                              | Pg. 20                          |
| Competing interests                            | 26     | Declare any competing interests of review authors.                                                                                                                                                                                         | Pg. 20                          |
| Availability of data, code and other materials | 27     | Report which of the following are publicly available and where they can be found: template data collection forms; data extracted from included studies; data used for all analyses; analytic code; any other materials used in the review. | Pg. 20                          |

**S1 Text A: Search terms**

(anxi\* OR GAD OR phobi\* OR "social anxiety" OR panic\* OR obsessi\* OR compulsi\* OR traumatic\* OR posttrauma\* OR post-trauma\* OR "post trauma\*" OR "combat disorder\*" OR "stress disorder\*" OR OCD OR ptsd) AND ("selective serotonin reuptake" OR "selective serotonin re-uptake inhibitors" OR "serotonin-specific reuptake inhibitors" OR ssri OR fluoxetine OR fluvoxamine OR sertraline OR paroxetine OR citalopram OR escitalopram OR dapoxetine OR "serotonin-norepinephrine reuptake" OR SNRI\* OR venlafaxine OR desvenlafaxine OR duloxetine OR milnacipran OR Levomilnacipran) AND ((randomized controlled trial[Publication Type] OR (randomized[Title/Abstract] OR randomised[Title/Abstract]) AND controlled[Title/Abstract] AND trial[Title/Abstract]) OR (meta-analysis OR metaanalysis OR "systematic review" OR metaanalyses OR meta-analyses OR "systematic-review"))

**S1 Table B:** Remission and response definitions in primary studies

| id   | Remission Definition                                                      | Placebo Remission (%) | Response Definition                                                                  | Placebo Response (%) |
|------|---------------------------------------------------------------------------|-----------------------|--------------------------------------------------------------------------------------|----------------------|
| JF10 | Liebowitz social anxiety scale total score $\leq 30$                      | 13                    | CGI-I $\leq 2$                                                                       | 36                   |
| JF11 | NA                                                                        | 8,3                   | NA                                                                                   | NA                   |
| JF15 | NA                                                                        | NA                    | CGI-I very much improved (score=1) or much improved (score=2) compared with baseline | NA                   |
| JF16 | NA                                                                        | NA                    | CGI-I score of 1 or 2 (very much or much improved)                                   | 42                   |
| JF22 | HAMA total score $\leq 7$                                                 | 33                    | $\geq 50\%$ reduction in HAMA total score                                            | 69                   |
| JF25 | NA                                                                        | NA                    | CGI $\leq 2$                                                                         | 32,4                 |
| JF28 | absence of full panic attacks during the 2-week period ending at week 10. | 50                    | number of attacks was reduced at least 50%                                           | NA                   |
| JF29 | HAMA total score as a score $\leq 7$ at endpoint                          | 27,2                  | $\geq 50\%$ decrease in HAMA total score                                             | 52,1                 |
| JF3  | HAM-A total score of $\leq 7$                                             | 29,5                  | 50% reduction from baseline in the HAM-A total score                                 | 45,5                 |
| JF34 | NA                                                                        | NA                    | CGI-I $\leq 2$                                                                       | 6,3                  |
| JF42 | NA                                                                        | NA                    | CGI-I $\leq 2$                                                                       | 35                   |
| JF56 | CGI-I=1 and panic-free                                                    | 25,4                  | CGI $\leq 2$                                                                         | 55,4                 |
| JF59 | NA                                                                        | NA                    | CGI $\geq 2$ and .30% reduction from baseline in CAPS-2                              | 32                   |
| JF61 | NA                                                                        | NA                    | $\geq 50\%$ reduction in HAM-A at end point                                          | 48,2                 |
| JF7  | Hamilton Anxiety scale $\leq 7$                                           | 18                    | CGI $\leq 2$                                                                         | 37                   |
| JF72 | NA                                                                        | NA                    | CGI $\leq 2$                                                                         | 11                   |
| JF78 | NA                                                                        | NA                    | Duke Global Rating Scale $\leq 2$                                                    | 62                   |
| JF80 | HAM-A total score $\leq 8$ at last two visits                             | 14                    | $\geq 50\%$ reduction in HAM-A at end point                                          | 42                   |
| JF82 | CGI-I=1                                                                   | 44,4                  | CGI-I $\leq 2$                                                                       | 77,7                 |
| JF83 | NA                                                                        | NA                    | $\geq 50\%$ reduction in HAM-A psychic score e somatic score                         | 35,5                 |
| JF87 | NA                                                                        | NA                    | $\geq 50\%$ reduction in HAM-A                                                       | 36                   |

|             |                                       |      |                                                                                  |       |
|-------------|---------------------------------------|------|----------------------------------------------------------------------------------|-------|
| <b>JF88</b> | HAM-A $\leq 7$                        | 16   | CGI-I $\leq 2$                                                                   | 41    |
| <b>JF89</b> | NA                                    | NA   | CGI-I $\leq 2$                                                                   | 16,7  |
| <b>JF9</b>  | HAMA $\leq 7$ at endpoint             | 19   | $\geq 50\%$ reduction from baseline in HAMA total score at endpoint              | 31    |
| <b>JF94</b> | NA                                    | NA   | CGI?                                                                             | 37,80 |
| <b>LM34</b> | NA                                    | NA   | CGI Improvement score of 1 or 2                                                  | 41,5  |
| <b>LM37</b> | NA                                    | NA   | CGI Improvement score of 1 or 2                                                  | 42    |
| <b>LM39</b> | NA                                    | NA   | 40% or greater decrease in CY-BOCS                                               | 25    |
| <b>LM4</b>  | CAPS-SX $\leq 20$                     | 37,5 | decrease in CAPS-X $\geq 30\%$ at 12 weeks                                       | 63,8  |
| <b>LM40</b> | NA                                    | NA   | CGI Improvement score of 1 or 2                                                  | 33,3  |
| <b>LM48</b> | NA                                    | NA   | CGI score of 1 or 2                                                              | 9     |
| <b>LM5</b>  | NA                                    | NA   | CGI Improvement score of 1 or 2                                                  | 31,7  |
| <b>LM50</b> | NA                                    | NA   | CGI score of 1 or 2                                                              | 30    |
| <b>LM54</b> | HAMA total score $\leq 7$ at endpoint | 19   | CGI score of 1 or 2                                                              | 41,8  |
| <b>LM57</b> | NA                                    | NA   | Duke Global Rating for PTSD score 1 or 2                                         | 33    |
| <b>LM59</b> | patient free of panic attack          | 22   | NA                                                                               | NA    |
| <b>LM6</b>  | NA                                    | NA   | 30% or greater decrease in the CAPS-2 scores and a CGI-I rating of 1 or 2        | NA    |
| <b>LM60</b> | Y-BOCS total $\leq 08$ at endpoint    | 8    | CGI-I score of 1 or 2                                                            | 21    |
| <b>LM71</b> | NA                                    | NA   | $\geq 25\%$ reduction in Y-BOCS                                                  | NA    |
| <b>LM72</b> | NA                                    | NA   | HAM-A responder criteria ( $\geq 50\%$ reduction from baseline)                  | NA    |
| <b>LM73</b> | NA                                    | NA   | CGI score of 1 or 2                                                              | 39    |
| <b>LM74</b> | HAM $< 10$ points                     | 29,6 | HAM-A responder criteria ( $\geq 50\%$ reduction from baseline)                  | 37,8  |
| <b>LM86</b> | NA                                    | NA   | CGI score improvement of 1, 2 or 3                                               | 66,7  |
| <b>LM95</b> | NA                                    | NA   | $\geq 30\%$ reduction IES-R                                                      | 6     |
| <b>MC1</b>  | NA                                    | NA   | CGI-I (Improvement) score was 1 (very much improvement) or 2 (much improvement). | NA    |

|              |                                                                                |       |                                                                                                                                 |      |
|--------------|--------------------------------------------------------------------------------|-------|---------------------------------------------------------------------------------------------------------------------------------|------|
| <b>MC10</b>  | SDS total score < 5                                                            | 15    | NA                                                                                                                              | NA   |
| <b>MC12</b>  | 0 full-symptoms panic attacks in the PAAS and CGI-I score of 1 or 2 at week 10 | 29,4  | CGI-I = 1 or 2                                                                                                                  | 58,8 |
| <b>MC13</b>  | NA                                                                             | NA    | CGI-I = 1 or 2 in week 12                                                                                                       | 31,9 |
| <b>MC14</b>  | LSAS score $\leq$ 30 and CGI-I score of 1                                      | 7     | CGI score of 1 or 2                                                                                                             | 30   |
| <b>MC15</b>  | NA                                                                             | NA    | CGI $\leq$ 2                                                                                                                    | 26   |
| <b>MC16</b>  | NA                                                                             | NA    | much or very much improved on the GCGI-I scale                                                                                  | 57   |
| <b>MC17</b>  | NA                                                                             | NA    | Clinical Global Impression– Improvement score of 1 or 2                                                                         | 36,1 |
| <b>MC20a</b> | % of patients reporting zero panic attacks                                     | 41    | NA                                                                                                                              | NA   |
| <b>MC22</b>  | HAM-A total score of $\leq$ 7                                                  | NA    | $\geq$ 50% decrease from baseline in HAM-A total score                                                                          | 42,2 |
| <b>MC25</b>  | NA                                                                             | NA    | week 16 CGI-I of 1 or 2                                                                                                         | 37   |
| <b>MC26</b>  | CY-BOCS score $\leq$ 10                                                        | 3,6   | NA                                                                                                                              | NA   |
| <b>MC28</b>  | NA                                                                             | NA    | CGI-I = 1 or 2 at endpoint                                                                                                      | 26   |
| <b>MC3</b>   | HAM-A total score 7 by week 24                                                 | 18,9  | 50% reduction in rating scale by week                                                                                           | 48,4 |
| <b>MC31</b>  | NA                                                                             | NA    | (“very much improved” or “much improved”) for global improvement on the Clinical Global Impression scale                        | 37   |
| <b>MC32</b>  | NA                                                                             | NA    | CGI-I score of 2 or 1                                                                                                           | 22,2 |
| <b>MC33</b>  | NA                                                                             | NA    | TOP-8 decrease >50%, CGI = 1 or 2, and patients no longer meeting DSM-IV PTSD criteria                                          | 37,5 |
| <b>MC34</b>  | NA                                                                             | NA    | 50% decrease in TOP-8 score from baseline, CGI $\leq$ 2 and absence of at least one of the core symptoms of PTSD based on CAPS. | 32,4 |
| <b>MC38</b>  | HAM-A total score $\leq$ 7                                                     | 27,4  | ( $\geq$ 50% decrease in the HAM-A total score from randomization)                                                              | 46,2 |
| <b>MC39</b>  | completely panic-free at the last visit of the acute phase                     | 15,3  | NA                                                                                                                              | NA   |
| <b>MC4</b>   | Reduction in Hamilton anxiety score to 10 or less                              | 17,64 | 50% reduction in Hamilton anxiety score or a CGI rating of 1 or 2                                                               | 24   |
| <b>MC40</b>  | Free of full panic attack                                                      | 28    | %CGI-S = 1 or 2                                                                                                                 | 37   |



|             |                                                                                                                |      |                                                                                                      |      |
|-------------|----------------------------------------------------------------------------------------------------------------|------|------------------------------------------------------------------------------------------------------|------|
| <b>MC42</b> | NA                                                                                                             | NA   | fall of at least 25% in Y-BOCS-Total score and CGI rating of 'much improved' or 'very much improved' | 26   |
| <b>MC44</b> | NA                                                                                                             | NA   | CGI-I rated as "much improved" or "very much improved"                                               | 42   |
| <b>MC45</b> | NA                                                                                                             | NA   | ≥ 25% improvement in Y-BOCS total score compared to baseline                                         | 36,6 |
| <b>MC51</b> | NA                                                                                                             | NA   | The percentage of patients free of panic attacks at week 8                                           | 47   |
| <b>MC55</b> | HAMA total score f7 at endpoint                                                                                | 20   | o50% reduction from baseline in HAMA total score at endpoint                                         | 42   |
| <b>MC56</b> | Final Hamilton Rating Scale for Anxiety (HAM-A) total score r7                                                 | 9,1  | a CGI-score of 1 (very much improved) or 2 (much improved)                                           | NA   |
| <b>MC6</b>  | NA                                                                                                             | NA   | Clinical Global Impressions-Improvement scale of 1 (very much improved) or 2 (much improved)         | 45   |
| <b>MC62</b> | NA                                                                                                             | NA   | o30% reduction in the IES-R total score plus obtaining a score of 1 or 2 on the CGI-I scale          | 3    |
| <b>MC73</b> | No full-symptom panic attacks on the PAAS and a CGI-S scale score of 1 or 2 ("not at all" or "borderline" ill) | 26,8 | CGI - a score of 1 (very much improved) or 2 (much improved)                                         | 59,9 |
| <b>MC77</b> | HAMA≤7                                                                                                         | 22,7 | CGI-I= 1 or 2                                                                                        | 47,2 |
| <b>MC79</b> | Zero full-symptom panic attacks on the PAAS and a CGI-S scale score of 1 or 2                                  | 23,7 | CGI-I= 1 or 2                                                                                        | 55,8 |
| <b>MC81</b> | NA                                                                                                             | NA   | NA                                                                                                   | NA   |
| <b>MC82</b> | CGI=1 or 2                                                                                                     | 17   | NA                                                                                                   | NA   |
| <b>MJ1</b>  | NA                                                                                                             | NA   | CGI-I = 1 or 2                                                                                       | 34   |
| <b>MJ14</b> | Hamilton Anxiety Scale total score < or =7                                                                     | 23   | > or = 50% reduction from baseline in HAM-A total score at endpoint                                  | 32   |
| <b>MJ16</b> | NA                                                                                                             | NA   | NA                                                                                                   | NA   |
| <b>MJ17</b> | NA                                                                                                             | NA   | CGI-I= 1 or 2                                                                                        | NA   |
| <b>MJ2</b>  | Zero major panic attacks                                                                                       | 60,7 | HAM-A Moderate severity                                                                              | 46,4 |
| <b>MJ22</b> | Percentage of patients who were free of full panic attacks for the 2 weeks prior to endpoint                   | 52,7 | CGI = 1 or 2                                                                                         | 46   |

|             |                                                                   |      |                                                                                                             |      |
|-------------|-------------------------------------------------------------------|------|-------------------------------------------------------------------------------------------------------------|------|
| <b>MJ25</b> | Hamilton Anxiety Scale Total Score <or= 7                         | 20   | CGI-I = 1 or 2                                                                                              | 45,6 |
| <b>MJ3</b>  | Zero panic attacks                                                | 38   | NA                                                                                                          | NA   |
| <b>MJ36</b> | NA                                                                | NA   | NA                                                                                                          | NA   |
| <b>MJ4</b>  | Liebowitz Social Anxiety Scale < or = 30                          | 16   | CGI = 1 or 2                                                                                                | 33   |
| <b>MJ42</b> | CGI-S = 1 or 2                                                    | 25   | CGI-I < or = 2                                                                                              | 39   |
| <b>MJ44</b> | NA                                                                | NA   | 25% reduction from baseline in the CY-BOCS score                                                            | 26   |
| <b>MJ5</b>  | NA                                                                | NA   | CGI-I = 1 or 2                                                                                              | 22,7 |
| <b>MJ53</b> | NA                                                                | NA   | CGI-I = 1 or 2                                                                                              | 23,9 |
| <b>MJ54</b> | CGI-S < or = 2                                                    | 35   | 50% improvement on the PARS Severity for GAD                                                                | 42   |
| <b>MJ56</b> | No longer meeting meeting criteria for PTSD assessed by K-SADS-PL | 46,6 | CGI-I < or = 2                                                                                              | 57,4 |
| <b>MJ64</b> | Clinician Administered PTSD Scale Part 2 total score <20          | 16,5 | CGI = 1 or 2                                                                                                | 38   |
| <b>MJ66</b> | NA                                                                | NA   | CGI = 1 or 2                                                                                                | 29   |
| <b>MJ70</b> | Clinician-Administered PTSD Scale <20                             | 10   | NA                                                                                                          | NA   |
| <b>MJ71</b> | NA                                                                | NA   | Reduction on the anxiety scale of the SAS of 50% or more at end point                                       | 7    |
| <b>MJ73</b> | NA                                                                | NA   | Physician's Global Improvement scale = 9 or 10                                                              | 21   |
| <b>MJ77</b> | CGI-I=1                                                           | 14,9 | CGI=1 or 2                                                                                                  | 38,3 |
| <b>MJ78</b> | NA                                                                | NA   | CGI=1 or 2                                                                                                  | 23,7 |
| <b>MJ80</b> | NA                                                                | NA   | CGI-I< 4                                                                                                    | 29   |
| <b>MJ84</b> | NA                                                                | NA   | CGI-I < or = 2                                                                                              | 44   |
| <b>MJ89</b> | Hamiton Anxiety Scale total score < or = 7                        | 32   | > or = 50% reduction from baseline to endpoint in the Hamilton Anxiety Scale - Anxiety subscale total score | 53   |
| <b>MJ93</b> | NA                                                                | NA   | CGI = 1 or 2                                                                                                | 20   |
| <b>MJ94</b> | NA                                                                | NA   | Reduction of 25% in the score of the Yale-Brown Obsessive-Compulsive Scale                                  | 35,4 |

|              |                                        |      |                                                                               |       |
|--------------|----------------------------------------|------|-------------------------------------------------------------------------------|-------|
| <b>MJ96</b>  | Hamilton Anxiety Rating Scale < or = 7 | 19,9 | At least 50% decrease from baseline Hamilton Anxiety Rating Scale total score | 36,6  |
| <b>UNG10</b> | NA                                     | NA   | CGI-I less or equal to 2                                                      | 42    |
| <b>UNG11</b> | NA                                     | NA   | 25% reduction of YBOCS                                                        | 27    |
| <b>UNG12</b> | NA                                     | NA   | 25% reduction of YBOCS                                                        | 42,7  |
| <b>UNG6</b>  | NA                                     | NA   | CGI-I less or equal to 2                                                      | 49,7  |
| <b>UNG7</b>  | HAM-A less than 7                      | 25,3 | CGI-I less or equal to 2                                                      | 51,9  |
| <b>UNG8</b>  | NA                                     | NA   | CGI-I less or equal to 2                                                      | 54,54 |
| <b>UNG9</b>  | NA                                     | NA   | CGI-I less or equal to 2                                                      | NA    |
| <b>UPD3</b>  | LSAS $\leq$ 30                         | 3,4  | CGI-I = 1 or 2                                                                | 69    |
| <b>UPD8</b>  | NA                                     | NA   | CGI-I = 1 or 2                                                                | 24    |

**S1 Fig. A:** Flowchart of included and excluded studies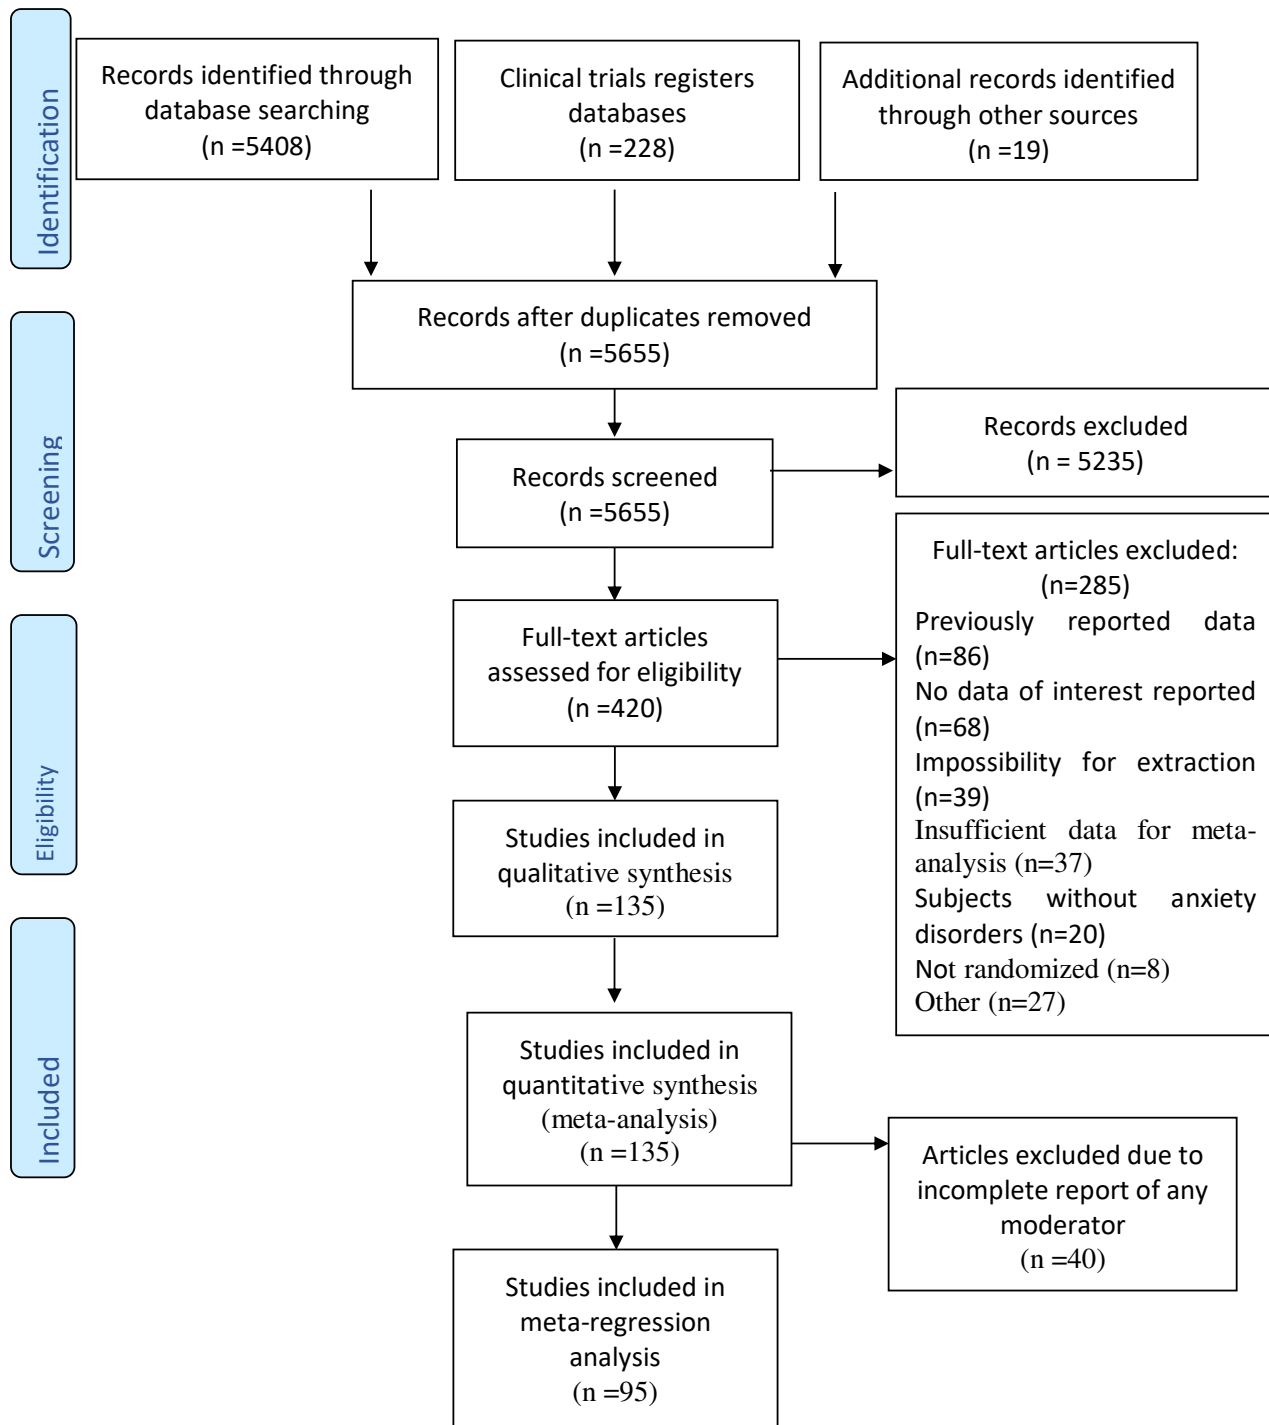

S1Table C: Studies general information

| id   | PMID / Other ID | Author         | Title                                                                                                                                                                                               | Pub. Status | Year of Publication | Funding  |
|------|-----------------|----------------|-----------------------------------------------------------------------------------------------------------------------------------------------------------------------------------------------------|-------------|---------------------|----------|
| JF10 | 2004379131      | Allgulander    | Efficacy of venlafaxine ER in patients with social anxiety disorder: A double-blind, placebo-controlled, parallel-group comparison with paroxetine                                                  | published   | 2004                | Industry |
| JF11 | 1999304629      | Allgulander C. | Paroxetine in social anxiety disorder: A randomized placebo-controlled study                                                                                                                        | published   | 1999                | Industry |
| JF15 | 2007092774      | Asakura S.     | Fluvoxamine treatment of generalized social anxiety disorder in Japan: A randomized double-blind, placebo-controlled study                                                                          | published   | 2006                | Industry |
| JF16 | 11472786        | Asnis          | Fluvoxamine in the treatment of panic disorder: a multi-center, double-blind, placebo-controlled study in outpatients.                                                                              | published   | 2001                | Industry |
| JF20 | 10665629        | Bakker         | Paroxetine, clomipramine, and cognitive therapy in the treatment of panic disorder.                                                                                                                 | published   | 1999                | academic |
| JF22 | 2006434703      | Baldwin        | Escitalopram and paroxetine in the treatment of generalised anxiety disorder: Randomised, placebo-controlled, double-blind study                                                                    | published   | 2006                | Industry |
| JF25 | 1999268351      | Baldwin D.     | Paroxetine in social phobia/social anxiety disorder: Randomised, double-blind, placebo-controlled study                                                                                             | published   | 1999                | Industry |
| JF28 | 1998025805      | Ballenger      | Double-blind, fixed-dose, placebo-controlled study of paroxetine in the treatment of panic disorder                                                                                                 | published   | 1998                | Industry |
| JF29 | 2010331033      | Bandelow       | Extended-release quetiapine fumarate (quetiapine XR): A once-daily monotherapy effective in generalized anxiety disorder. Data from a randomized, double-blind, placebo-and active-controlled study | published   | 2010                | Industry |
| JF3  | 24644106        | Alaka          | Efficacy and safety of duloxetine in the treatment of older adult patients with generalized anxiety disorder: a randomized, double-blind, placebo-controlled trial.                                 | published   | 2014                | Industry |

|             |            |                    |                                                                                                                                                                                  |           |      |                            |
|-------------|------------|--------------------|----------------------------------------------------------------------------------------------------------------------------------------------------------------------------------|-----------|------|----------------------------|
| <b>JF34</b> | 2007567996 | Beidel D.C.        | SET-C versus fluoxetine in the treatment of childhood social phobia                                                                                                              | published | 2007 | Industry                   |
| <b>JF42</b> | 12649628   | Birmaher           | Fluoxetine for the treatment of childhood anxiety disorders.                                                                                                                     | published | 2003 | governmental or non-profit |
| <b>JF45</b> | 8422221    | Black              | A comparison of fluvoxamine, cognitive therapy, and placebo in the treatment of panic disorder.                                                                                  | published | 1993 | academic                   |
| <b>JF56</b> | 2005461776 | Bradwejn           | Venlafaxine extended-release capsules in panic disorder: Flexible-dose, double-blind, placebo-controlled study                                                                   | published | 2005 | academic                   |
| <b>JF59</b> | 2000137979 | Brady              | Efficacy and safety of sertraline treatment of posttraumatic stress disorder: A randomized controlled trial                                                                      | published | 2000 | unclear                    |
| <b>JF61</b> | 2006335133 | Brawman-Mintzer O. | Sertraline treatment for generalized anxiety disorder: A randomized, double-blind, placebo-controlled study                                                                      | published | 2006 | Industry                   |
| <b>JF7</b>  | 2004388355 | Allgulander        | Efficacy of sertraline in a 12-week trial for generalized anxiety disorder                                                                                                       | published | 2004 | Industry                   |
| <b>JF72</b> | 2274626    | Chouinard          | Results of a double-blind placebo controlled trial of a new serotonin uptake inhibitor, sertraline, in the treatment of obsessive-compulsive disorder.                           | published | 1990 | Industry                   |
| <b>JF78</b> | 1999231913 | Connor K.M.        | Fluoxetine in post-traumatic stress disorder. Randomised, double-blind study                                                                                                     | published | 1999 | unclear                    |
| <b>JF80</b> | 20455246   | Coric              | Multicenter, randomized, double-blind, active comparator and placebo-controlled trial of a corticotropin-releasing factor receptor-1 antagonist in generalized anxiety disorder. | published | 2010 | governmental or non-profit |
| <b>JF82</b> | 2013806668 | Da Costa           | Comparison among clomipramine, fluoxetine, and placebo for the treatment of anxiety disorders in children and adolescents                                                        | published | 2013 | Industry                   |
| <b>JF83</b> | 15877709   | Dahl               | Sertraline in generalized anxiety disorder: efficacy in treating the psychic and somatic anxiety factors.                                                                        | published | 2005 | academic                   |
| <b>JF87</b> | 1999307984 | Davidson           | Efficacy, safety, and tolerability of venlafaxine extended release and buspirone in outpatients with generalized anxiety disorder                                                | published | 1999 | academic                   |

|             |            |               |                                                                                                                                                       |           |      |          |
|-------------|------------|---------------|-------------------------------------------------------------------------------------------------------------------------------------------------------|-----------|------|----------|
| <b>JF88</b> | 2004332730 | Davidson      | Escitalopram in the treatment of generalized anxiety disorder: Double-blind, placebo controlled, flexible-dose study                                  | published | 2004 | Industry |
| <b>JF89</b> | 15206657   | Davidson      | Fluvoxamine-controlled release formulation for the treatment of generalized social anxiety disorder.                                                  | published | 2004 | Industry |
| <b>JF9</b>  | 17559726   | Koponen       | Efficacy of Duloxetine for the Treatment of Generalized Anxiety Disorder: Implications for Primary Care Physicians                                    | published | 2007 | Industry |
| <b>JF94</b> | NA         | Asakura S.    | A randomized, double-blind, placebo-controlled study of escitalopram in patients with social anxiety disorder in Japan                                | published | 2016 | Industry |
| <b>LM10</b> | 1697419    | Den Boer      | Serotonin function in panic disorder: a double blind placebo controlled study with fluvoxamine and ritanserin.                                        | published | 1990 | Industry |
| <b>LM23</b> | 2011102179 | Fani N.       | Increased neural response to trauma scripts in posttraumatic stress disorder following paroxetine treatment: A pilot study                            | published | 2011 | Industry |
| <b>LM24</b> | 2009487779 | Fani N.       | Neuropsychological functioning in patients with posttraumatic stress disorder following short-term paroxetine treatment                               | published | 2009 | Industry |
| <b>LM34</b> | 2007265412 | Friedman M.J. | Randomized, double-blind comparison of sertraline and placebo for posttraumatic stress disorder in a department of veterans affairs setting           | published | 2007 | Industry |
| <b>LM37</b> | 2000217510 | Gelenberg     | Efficacy of venlafaxine extended-release capsules in nondepressed outpatients with generalized anxiety disorder a 6-month randomized controlled trial | published | 2000 | Industry |
| <b>LM39</b> | 2001231890 | Geller D.A.   | Fluoxetine treatment for obsessive-compulsive disorder in children and adolescents: A placebo-controlled clinical trial                               | published | 2001 | Industry |
| <b>LM4</b>  | 2006486251 | Davidson J.   | Treatment of posttraumatic stress disorder with venlafaxine extended release: A 6-month randomized controlled trial                                   | published | 2006 | Industry |
| <b>LM40</b> | 2004455208 | Geller D.A.   | Paroxetine treatment in children and adolescents with obsessive-compulsive                                                                            | published | 2004 | Industry |

|             |            |                 |                                                                                                                                                                                                |           |      |                            |
|-------------|------------|-----------------|------------------------------------------------------------------------------------------------------------------------------------------------------------------------------------------------|-----------|------|----------------------------|
|             |            |                 | disorder: A randomized, multicenter, double-blind, placebo-controlled trial                                                                                                                    |           |      |                            |
| <b>LM42</b> | 2014038390 | Gimenez M.      | Functional effects of chronic paroxetine versus placebo on the fear, stress and anxiety brain circuit in Social Anxiety Disorder: Initial validation of an imaging protocol for drug discovery | published | 2013 | Industry                   |
| <b>LM48</b> | 1996126650 | Goodman W.K.    | Treatment of obsessive-compulsive disorder with fluvoxamine: A multicentre, double-blind, placebo-controlled trial                                                                             | published | 1996 | Industry                   |
| <b>LM5</b>  | 2004433622 | Davidson J.R.T. | Fluoxetine, comprehensive cognitive behavioral therapy, and placebo in generalized social phobia                                                                                               | published | 2004 | governmental or non-profit |
| <b>LM50</b> | 1995114731 | Greist          | Double-blind parallel comparison of three dosages of sertraline and placebo in outpatients with obsessive-compulsive disorder                                                                  | published | 1995 | Industry                   |
| <b>LM54</b> | 2007173305 | Hartford        | Duloxetine as an SNRI treatment for generalized anxiety disorder: Results from a placebo and active-controlled trial                                                                           | published | 2007 | Industry                   |
| <b>LM57</b> | 10907802   | Hertzberg       | Lack of efficacy for fluoxetine in PTSD: a placebo controlled trial in combat veterans.                                                                                                        | published | 2000 | Industry                   |
| <b>LM59</b> | 8227490    | Hoehn-Saric     | Effect of fluvoxamine on panic disorder.                                                                                                                                                       | published | 1993 | academic                   |
| <b>LM6</b>  | 2001168539 | Davidson J.R.T. | Multicenter, double-blind comparison of sertraline and placebo in the treatment of posttraumatic stress disorder                                                                               | published | 2001 | Industry                   |
| <b>LM60</b> | 2003250843 | Hollander       | A double-blind, placebo-controlled study of the efficacy and safety of controlled-release fluvoxamine in patients with obsessive-compulsive disorder                                           | published | 2003 | Industry                   |
| <b>LM67</b> | 2143637    | Jenike          | A controlled trial of fluvoxamine in obsessive-compulsive disorder: implications for a serotonergic theory.                                                                                    | published | 1990 | academic                   |
| <b>LM69</b> | 1997265747 | Jenike M.A.     | Placebo-controlled trial of fluoxetine and phenelzine for obsessive-compulsive disorder                                                                                                        | published | 1997 | governmental or non-profit |



|             |            |                 |                                                                                                                                                           |           |      |                            |
|-------------|------------|-----------------|-----------------------------------------------------------------------------------------------------------------------------------------------------------|-----------|------|----------------------------|
| <b>LM71</b> | 2004359161 | Kamijima K.     | Paroxetine in the treatment of obsessive-compulsive disorder: Randomized, double-blind, placebo-controlled study in Japanese patients                     | published | 2004 | academic                   |
| <b>LM72</b> | 2009168154 | Kasper          | Efficacy of pregabalin and venlafaxine-XR in generalized anxiety disorder: Results of a double-blind, placebo-controlled 8-week trial                     | published | 2009 | Industry                   |
| <b>LM73</b> | 2005116331 | Kasper          | Escitalopram in the treatment of social anxiety disorder: Randomised, placebo-controlled, flexible-dosage study                                           | published | 2005 | Industry                   |
| <b>LM74</b> | 2014307110 | Kasper S.       | Lavender oil preparation Silexan is effective in generalized anxiety disorder - A randomized, double-blind comparison to placebo and paroxetine           | published | 2014 | academic                   |
| <b>LM76</b> | 1995265890 | Katzelnick D.J. | Sertraline for social phobia: A double-blind, placebo-controlled crossover study                                                                          | published | 1995 | Industry                   |
| <b>LM86</b> | 20462466   | Koszycki        | A randomized trial of sertraline, self-administered cognitive behavior therapy, and their combination for panic disorder.                                 | published | 2011 | Industry                   |
| <b>LM95</b> | 28266242   | Li              | Effect and safety of sertraline for treat posttraumatic stress disorder: a multicenter randomised controlled study                                        | published | 2017 | academic                   |
| <b>MC1</b>  | 16175565   | Ledley          | Impact of depressive symptoms on the treatment of generalized social anxiety disorder.                                                                    | published | 2005 | governmental or non-profit |
| <b>MC10</b> | 15003077   | Lepola          | Controlled-release paroxetine in the treatment of patients with social anxiety disorder.                                                                  | published | 2004 | Industry                   |
| <b>MC12</b> | 2009266799 | Liebowitz       | A double-blind, placebo-controlled, parallel-group, flexible-dose study of venlafaxine extended release capsules in adult outpatients with panic disorder | published | 2009 | Industry                   |
| <b>MC13</b> | 2002049438 | Liebowitz       | A randomized, double-blind, fixed-dose comparison of paroxetine and placebo in the treatment of generalized social anxiety disorder                       | published | 2002 | Industry                   |
| <b>MC14</b> | 2005105216 | Liebowitz       | A randomized controlled trial of venlafaxine extended release in generalized social anxiety disorder                                                      | published | 2005 | Industry                   |

|              |            |                 |                                                                                                                                                                                                     |           |      |                            |
|--------------|------------|-----------------|-----------------------------------------------------------------------------------------------------------------------------------------------------------------------------------------------------|-----------|------|----------------------------|
| <b>MC15</b>  | 2003299727 | Liebowitz       | Efficacy of sertraline in severe generalized social anxiety disorder: Results of a double-blind, placebo-controlled study                                                                           | published | 2003 | Industry                   |
| <b>MC16</b>  | 12447029   | Liebowitz       | Fluoxetine in children and adolescents with OCD: a placebo-controlled trial.                                                                                                                        | published | 2002 | Industry                   |
| <b>MC17</b>  | 2005062649 | Liebowitz M.R.  | Venlafaxine extended release vs placebo and paroxetine in social anxiety disorder                                                                                                                   | published | 2005 | Industry                   |
| <b>MC2</b>   | 2000096828 | Leinonen        | Citalopram controls phobic symptoms in patients with panic disorder: Randomized controlled trial                                                                                                    | published | 2000 | academic                   |
| <b>MC20a</b> | 1998228027 | Londborg P.D.   | Sertraline in the treatment of panic disorder. A multi-site, double-blind, placebo-controlled, fixed-dose investigation                                                                             | published | 1998 | Industry                   |
| <b>MC20b</b> | 1998228027 | Londborg P.D.   | Sertraline in the treatment of panic disorder. A multi-site, double-blind, placebo-controlled, fixed-dose investigation                                                                             | published | 1998 | Industry                   |
| <b>MC22</b>  | 2013802284 | Mahableshwarkar | A randomised, double-blind, placebo-controlled, duloxetine-referenced study of the efficacy and tolerability of vortioxetine in the acute treatment of adults with generalised anxiety disorder     | published | 2013 | Industry                   |
| <b>MC25</b>  | 2007528912 | March           | A Randomized Controlled Trial of Venlafaxine ER Versus Placebo in Pediatric Social Anxiety Disorder                                                                                                 | published | 2007 | Industry                   |
| <b>MC26</b>  | 2004455374 | March           | Cognitive-behavior therapy, sertraline, and their combination for children and adolescents with obsessive-compulsive disorder: The pediatric OCD treatment study (POTS) randomized controlled trial | published | 2004 | governmental or non-profit |
| <b>MC28</b>  | 1998400055 | March J.S.      | Sertraline in children and adolescents with obsessive-compulsive disorder: A multicenter randomized controlled trial                                                                                | published | 1998 | Industry                   |
| <b>MC3</b>   | 2003412218 | Lenox-Smith     | A double-blind, randomised, placebo controlled study of venlafaxine XL in patients with generalised anxiety disorder in primary care                                                                | published | 2003 | Industry                   |

|             |            |              |                                                                                                                                                                                                    |           |      |          |
|-------------|------------|--------------|----------------------------------------------------------------------------------------------------------------------------------------------------------------------------------------------------|-----------|------|----------|
| <b>MC31</b> | 2001420732 | Marshall     | Efficacy and safety of paroxetine treatment for chronic PTSD: A fixed-dose, placebo-controlled study                                                                                               | published | 2001 | Industry |
| <b>MC32</b> | 2007163092 | Marshall     | A controlled trial of paroxetine for chronic PTSD, dissociation, and interpersonal problems in mostly minority adults                                                                              | published | 2007 | unclear  |
| <b>MC33</b> | 17414240   | Martenyi     | Failed efficacy of fluoxetine in the treatment of posttraumatic stress disorder: results of a fixed-dose, placebo-controlled study.                                                                | published | 2007 | Industry |
| <b>MC34</b> | 2006287406 | Martenyi     | Fluoxetine in the acute treatment and relapse prevention of combat-related post-traumatic stress disorder: Analysis of the veteran group of a placebo-controlled, randomized clinical trial        | published | 2006 | unclear  |
| <b>MC38</b> | 2011677266 | Merideth     | Efficacy and tolerability of extended release quetiapine fumarate monotherapy in the acute treatment of generalized anxiety disorder: A randomized, placebo controlled and active-controlled study | published | 2011 | Industry |
| <b>MC39</b> | 9812120    | Michelson    | Outcome assessment and clinical improvement in panic disorder: evidence from a randomized controlled trial of fluoxetine and placebo. The Fluoxetine Panic Disorder Study Group.                   | published | 1998 | Industry |
| <b>MC4</b>  | 2005031032 | Lenze        | Efficacy and tolerability of citalopram in the treatment of late-life anxiety disorders: Results from an 8-week randomized, placebo-controlled trial                                               | published | 2005 | academic |
| <b>MC40</b> | 2002013536 | Michelson D. | Efficacy of usual antidepressant dosing regimens of fluoxetine in panic disorder. Randomised, placebo-controlled trial                                                                             | published | 2001 | Industry |
| <b>MC42</b> | 1994091030 | Montgomery   | A double-blind, placebo-controlled study of fluoxetine in patients with DSM-III-R obsessive-compulsive disorder                                                                                    | published | 1993 | unclear  |
| <b>MC44</b> | 2006302530 | Montgomery   | Efficacy and safety of pregabalin in the treatment of generalized anxiety disorder: A 6-week, multicenter, randomized, double-blind, placebo-controlled comparison of pregabalin and venlafaxine   | published | 2006 | Industry |

|             |            |               |                                                                                                                                                                                            |           |      |                            |
|-------------|------------|---------------|--------------------------------------------------------------------------------------------------------------------------------------------------------------------------------------------|-----------|------|----------------------------|
| <b>MC45</b> | 2001077435 | Montgomery    | Citalopram 20 mg, 40 mg and 60 mg are all effective and well tolerated compared with placebo in obsessive-compulsive disorder                                                              | published | 2001 | Industry                   |
| <b>MC51</b> | 9160622    | Nair          | Comparison of fluvoxamine, imipramine, and placebo in the treatment of outpatients with panic disorder.                                                                                    | published | 1996 | Industry                   |
| <b>MC55</b> | 18485261   | Nicolini      | Improvement of psychic and somatic symptoms in adult patients with generalized anxiety disorder: examination from a duloxetine, venlafaxine extended-release and placebo-controlled trial. | published | 2008 | unclear                    |
| <b>MC56</b> | 2004493169 | Nimatoudis I. | Remission rates with venlafaxine extended release in Greek outpatients with generalized anxiety disorder. A double-blind, randomized, placebo                                              | published | 2004 | unclear                    |
| <b>MC6</b>  | 2009047569 | Lenze         | Escitalopram for older adults with generalized anxiety disorder: A randomized controlled trial                                                                                             | published | 2009 | governmental or non-profit |
| <b>MC62</b> | 21349225   | Panahi        | A randomized, double-blind, placebo-controlled trial on the efficacy and tolerability of sertraline in Iranian veterans with post-traumatic stress disorder.                               | published | 2011 | academic                   |
| <b>MC73</b> | 2007466592 | Pollack       | A randomized controlled trial of venlafaxine ER and paroxetine in the treatment of outpatients with panic disorder                                                                         | published | 2007 | Industry                   |
| <b>MC77</b> | 11411817   | Pollack       | Paroxetine in the treatment of generalized anxiety disorder: results of a placebo-controlled, flexible-dosage trial.                                                                       | published | 2001 | Industry                   |
| <b>MC79</b> | 2007096532 | Pollack       | A double-blind study of the efficacy of venlafaxine extended-release, paroxetine, and placebo in the treatment of panic disorder                                                           | published | 2006 | Industry                   |
| <b>MC81</b> | 1997005505 | Pollack       | Venlafaxine for panic disorder: Results from a double-blind, placebo- controlled study                                                                                                     | published | 1996 | unclear                    |
| <b>MC82</b> | 1998374883 | Pollack M.H.  | Sertraline in the treatment of panic disorder: A flexible-dose multicenter trial                                                                                                           | published | 1998 | Industry                   |
| <b>MJ1</b>  | 2004408566 | Rickels       | A double-blind, placebo-controlled study of a flexible dose of venlafaxine ER in adult                                                                                                     | published | 2004 | unclear                    |

|             |            |             |                                                                                                                                                      |           |      |                            |
|-------------|------------|-------------|------------------------------------------------------------------------------------------------------------------------------------------------------|-----------|------|----------------------------|
|             |            |             | outpatients with generalized social anxiety disorder                                                                                                 |           |      |                            |
| <b>MJ14</b> | 2008171568 | Rynn        | Efficacy and safety of duloxetine in the treatment of generalized anxiety disorder: A flexible-dose, progressive-titration, placebo-controlled trial | published | 2007 | Industry                   |
| <b>MJ16</b> | 2001420736 | Rynn M.A.   | Placebo-controlled trial of sertraline in the treatment of children with generalized anxiety disorder                                                | published | 2001 | governmental or non-profit |
| <b>MJ17</b> | 1998292538 | Sandmann J. | Fluvoxamine or placebo in the treatment of panic disorder and relationship to blood concentrations of fluvoxamine                                    | published | 1998 | academic                   |
| <b>MJ2</b>  | 2000222191 | Rickels     | Efficacy of extended-release Venlafaxine in nondepressed outpatients with generalized anxiety disorder                                               | published | 2000 | Industry                   |
| <b>MJ22</b> | 1996223201 | Sharp D.M.  | Fluvoxamine, placebo, and cognitive behaviour therapy used alone and in combination in the treatment of panic disorder and agoraphobia               | published | 1996 | Industry                   |
| <b>MJ25</b> | 15669886   | Sheehan     | Efficacy and tolerability of controlled-release paroxetine in the treatment of panic disorder.                                                       | published | 2005 | Industry                   |
| <b>MJ3</b>  | 2005347556 | Rickels K.  | Paroxetine treatment of generalized anxiety disorder: A double-blind, placebo-controlled study                                                       | published | 2003 | Industry                   |
| <b>MJ36</b> | 2003496184 | Stahl       | Escitalopram in the Treatment of Panic Disorder: A Randomized, Double-Blind, Placebo-Controlled Trial                                                | published | 2003 | Industry                   |
| <b>MJ4</b>  | 1429406    | Riddle      | Double-blind, crossover trial of fluoxetine and placebo in children and adolescents with obsessive-compulsive disorder.                              | published | 1992 | governmental or non-profit |
| <b>MJ42</b> | 2005044275 | Stein       | Efficacy of low and higher dose extended-release venlafaxine in generalized social anxiety disorder: A 6-month randomized controlled trial           | published | 2004 | Industry                   |
| <b>MJ44</b> | 2007198511 | Stein       | Escitalopram in obsessive-compulsive disorder: A randomized, placebo-controlled, paroxetine-referenced, fixed-dose, 24-week study                    | published | 2007 | Industry                   |

|             |            |                    |                                                                                                                                                                                                                  |           |      |                            |
|-------------|------------|--------------------|------------------------------------------------------------------------------------------------------------------------------------------------------------------------------------------------------------------|-----------|------|----------------------------|
| <b>MJ5</b>  | 2001046511 | Riddle M.A.        | Fluvoxamine for children and adolescents with obsessive-compulsive disorder: A randomized, controlled, multicenter trial                                                                                         | published | 2001 | Industry                   |
| <b>MJ53</b> | 1999166603 | Stein M.B.         | Fluvoxamine treatment of social phobia (social anxiety disorder): A double-blind, placebo-controlled study                                                                                                       | published | 1999 | Industry                   |
| <b>MJ54</b> | 1998297625 | Stein M.B.         | Paroxetine treatment of generalized social phobia (social anxiety disorder): A randomized controlled trial                                                                                                       | published | 1998 | Industry                   |
| <b>MJ56</b> | 2015802599 | Strawn             | A randomized, placebo-controlled study of duloxetine for the treatment of children and adolescents with generalized anxiety disorder                                                                             | published | 2015 | Industry                   |
| <b>MJ6</b>  | 2011001857 | Robb A.S.          | Sertraline treatment of children and adolescents with posttraumatic stress disorder: A double-blind, placebo-controlled trial                                                                                    | published | 2010 | Industry                   |
| <b>MJ64</b> | 14608246   | Tucker             | Can physiologic assessment and side effects tease out differences in PTSD trials? A double-blind comparison of citalopram, sertraline, and placebo.                                                              | published | 2003 | Industry                   |
| <b>MJ66</b> | 2001431494 | Tucker P.          | Paroxetine in the treatment of chronic posttraumatic stress disorder: Results of a placebo-controlled, flexible-dosage trial                                                                                     | published | 2001 | unclear                    |
| <b>MJ70</b> | 2001050465 | Van Ameringen M.A. | Sertraline treatment of generalized social phobia: A 20-week, double-blind, placebo-controlled study                                                                                                             | published | 2001 | Industry                   |
| <b>MJ71</b> | 2007077920 | Van Der Kolk       | A Randomized clinical trial of eye movement desensitization and reprocessing (EMDR), fluoxetine, and pill placebo in the treatment of posttraumatic stress disorder: treatment effects and long-term maintenance | published | 2007 | Industry                   |
| <b>MJ73</b> | 1994203727 | Van Vliet I.M.     | Psychopharmacological treatment of social phobia; a double blind placebo controlled study with fluvoxamine                                                                                                       | published | 1993 | governmental or non-profit |
| <b>MJ77</b> | 9330022    | Wade               | The effect of citalopram in panic disorder.                                                                                                                                                                      | published | 1997 | unclear                    |

|             |            |            |                                                                                                                                                                                                                        |             |             |                            |
|-------------|------------|------------|------------------------------------------------------------------------------------------------------------------------------------------------------------------------------------------------------------------------|-------------|-------------|----------------------------|
| <b>MJ78</b> | 2004471921 | Wagner     | A multicenter, randomized, double-blind, placebo-controlled trial of paroxetine in children and adolescents with social anxiety disorder                                                                               | published   | 2004        | unclear                    |
| <b>MJ79</b> | 18974308   | Walkup     | Cognitive behavioral therapy, sertraline, or a combination in childhood anxiety.                                                                                                                                       | published   | 2008        | Industry                   |
| <b>MJ80</b> | 11323729   | Pine       | Fluvoxamine for the treatment of anxiety disorders in children and adolescents. The Research Unit on Pediatric Psychopharmacology Anxiety Study Group.                                                                 | published   | 2001        | governmental or non-profit |
| <b>MJ84</b> | 2004049533 | Westenberg | A Double-Blind Placebo-Controlled Study of Controlled Release Fluvoxamine for the Treatment of Generalized Social Anxiety Disorder                                                                                     | published   | 2004        | Industry                   |
| <b>MJ85</b> | 2528158    | Westenberg | Selective monoamine uptake inhibitors and a serotonin antagonist in the treatment of panic disorder.                                                                                                                   | published   | 1989        | Industry                   |
| <b>MJ89</b> | 2011586428 | Wu         | Duloxetine versus placebo in the treatment of patients with generalized anxiety disorder in China                                                                                                                      | published   | 2011        | academic                   |
| <b>MJ93</b> | 2002132412 | Zohar      | Double-blind placebo-controlled pilot study of sertraline in military veterans with posttraumatic stress disorder                                                                                                      | published   | 2002        | Industry                   |
| <b>MJ94</b> | 1996302206 | Zohar      | Paroxetine versus clomipramine in the treatment of obsessive-compulsive disorder                                                                                                                                       | published   | 1996        | Industry                   |
| <b>MJ96</b> | 2192564    | Jenike     | Sertraline in Obsessive-Compulsive Disorder: A double-Blind Comparison With Placebo                                                                                                                                    | published   | 1990        | Industry                   |
| <b>MJ97</b> | 2192564    | Jenike     | Sertraline in Obsessive-Compulsive Disorder: A double-Blind Comparison With Placebo                                                                                                                                    | published   | 1990        | Industry                   |
| <b>UNG9</b> | NKF100110  | Unknown    | A Randomized, Double-Blind, Parallel-Group, Placebo-Controlled, Forced-Dose Titration Study Evaluating the Efficacy and Safety of a New Chemical Entity (NCE) and Paroxetine in Subjects with Social Anxiety Disorder. | unpublished | unpublished | Industry                   |

|              |                                |         |                                                                                                                                                                                                                                                                                                                                                                                      |             |             |          |
|--------------|--------------------------------|---------|--------------------------------------------------------------------------------------------------------------------------------------------------------------------------------------------------------------------------------------------------------------------------------------------------------------------------------------------------------------------------------------|-------------|-------------|----------|
| <b>UNG1</b>  | SCT-MD-05                      | Unknown | Escitalopram in the treatment of generalized anxiety disorder: Double-blind, placebo controlled, flexible-dose study                                                                                                                                                                                                                                                                 | unpublished | unpublished | Industry |
| <b>UNG10</b> | NKP102280                      | Unknown | A double-blind, double dummy, placebo-controlled, randomised, parallel group positron emission tomography (PET) study to investigate the effects of a 8 week administration of a new compound and Paroxetine in combination or Paroxetine alone (7.5 mg) on regional cerebral blood flow (rCBF) during a Public Speaking test in subjects affected by social anxiety disorder (SAD). | unpublished | unpublished | Industry |
| <b>UNG11</b> | BRL-029060/CPMS-116            | Unknown | Paroxetine versus Placebo in the Treatment of Obsessive-Compulsive Disorder                                                                                                                                                                                                                                                                                                          | unpublished | unpublished | Industry |
| <b>UNG12</b> | MY- 1028/BRL-029060/1/CPMS-118 | Unknown | Paroxetine versus Clomipramine and Placebo in the Treatment of Obsessive-Compulsive Disorder                                                                                                                                                                                                                                                                                         | unpublished | unpublished | Industry |
| <b>UNG17</b> | NKP103401                      | Unknown | A randomized, double-blind, parallel group, placebo-controlled fixed dose study comparing the efficacy and safety of New Chemical Entity (NCE)/Paroxetine combination of Paroxetine monotherapy to placebo in subjects with Social Anxiety Disorder (SAD)                                                                                                                            | unpublished | unpublished | Industry |
| <b>UNG2</b>  | SCT-MD-06                      | Unknown | Flexible-dose comparison of the safety and efficacy of Escitalopram and placebo in the treatment of generalized anxiety disorder                                                                                                                                                                                                                                                     | unpublished | unpublished | Industry |



|             |                          |              |                                                                                                                                                                                      |             |             |                            |
|-------------|--------------------------|--------------|--------------------------------------------------------------------------------------------------------------------------------------------------------------------------------------|-------------|-------------|----------------------------|
| <b>UNG3</b> | NCT01933919              | Unknown      | A phase 3 study of fluvoxamine (SME3110) in pediatric/adolescent patients with obsessive compulsive disorder                                                                         | unpublished | unpublished | Industry                   |
| <b>UNG6</b> | GSK 637                  | Hewett       | A double-blind, placebo controlled study to evaluate the efficacy and tolerability of paroxetine in patients with generalized anxiety disorder (GAD)                                 | unpublished | unpublished | Industry                   |
| <b>UNG7</b> | GSK 791                  | Unknown      | A randomized, double-blind, placebo-controlled, flexible dosage trial to evaluate the efficacy and tolerability of Paroxetine CR in patients with generalized anxiety disorder (GAD) | unpublished | unpublished | Industry                   |
| <b>UNG8</b> | Sonne draft              | Sonne        | The effect of Paroxetine in the treatment of comorbid PTSD and substance dependence                                                                                                  | unpublished | unpublished | Industry                   |
| <b>UPD3</b> | 10.4172/2167-1044.S1-014 | Liebowitz MR | A 12-Week Double-Blind, Placebo-Controlled, Flexible-Dose Trial of Desvenlafaxine Extended-Release Tablets in Generalized Social Anxiety Disorder                                    | published   | 2015        | Industry                   |
| <b>UPD8</b> | 32857933                 | Strawn JR    | Escitalopram in Adolescents With Generalized Anxiety Disorder: A Double-Blind, Randomized, Placebo-Controlled Study                                                                  | published   | 2015        | governmental or non-profit |

**S1Table D:** Studies demographic information

| <b>id</b>   | <b>Country</b> | <b>Number of Sites</b> | <b>Population</b>    | <b>Sampling</b> | <b>Main Disorder</b> | <b>n Placebo Arm (Baseline)</b> | <b>n Drug(s) Arm(s) (Baseline)</b> | <b>Number of Drug(s) Arms</b> |
|-------------|----------------|------------------------|----------------------|-----------------|----------------------|---------------------------------|------------------------------------|-------------------------------|
| <b>JF10</b> | Unclear        | Several                | Adults/Elderly       | Outpatients     | SAD                  | 132                             | 257                                | 2                             |
| <b>JF11</b> | Sweden         | 1                      | Adults/Elderly       | Outpatients     | SAD                  | 48                              | 44                                 | 1                             |
| <b>JF15</b> | Japan          | 54                     | Adults/Elderly       | Unclear         | SAD                  | 89                              | 176                                | 1                             |
| <b>JF16</b> | USA            | 1                      | Adults/Elderly       | Unclear         | Panic                | 95                              | 93                                 | 1                             |
| <b>JF20</b> | Netherlands    | 2                      | Adults/Elderly       | Outpatients     | Panic                | 39                              | 38                                 | 1                             |
| <b>JF22</b> | Several        | 63                     | Adults/Elderly       | Outpatients     | GAD                  | 139                             | 407                                | 3                             |
| <b>JF25</b> | Several        | 39                     | Adults/Elderly       | Community       | SAD                  | 151                             | 139                                | 1                             |
| <b>JF28</b> | USA and Canada | 20                     | Adults/Elderly       | Unclear         | Panic                | 69                              | 209                                | 3                             |
| <b>JF29</b> | Several        | 112                    | Adults/Elderly       | Outpatients     | GAD                  | 217                             | 217                                | 1                             |
| <b>JF3</b>  | Several        | 47                     | Adults/Elderly       | Outpatients     | GAD                  | 140                             | 151                                | 1                             |
| <b>JF34</b> | USA            | 2                      | Children/Adolescents | Community       | SAD                  | 32                              | 33                                 | 1                             |
| <b>JF42</b> | Unclear        | Unclear                | Children/Adolescents | Mixed           | More than 1 AnxDis   | 37                              | 37                                 | 1                             |
| <b>JF45</b> | Unclear        | Several                | Adults/Elderly       | Community       | Panic                | 25                              | 25                                 | 1                             |
| <b>JF56</b> | Several        | 50                     | Adults/Elderly       | Outpatients     | Panic                | 180                             | 181                                | 1                             |
| <b>JF59</b> | Unclear        | 14                     | Adults/Elderly       | Outpatients     | PTSD                 | 93                              | 94                                 | 1                             |
| <b>JF61</b> | USA            | 9                      | Adults/Elderly       | Outpatients     | GAD                  | 170                             | 68                                 | 1                             |
| <b>JF7</b>  | Several        | 21                     | Adults/Elderly       | Outpatients     | GAD                  | 190                             | 188                                | 1                             |
| <b>JF72</b> | Unclear        | 6                      | Adults/Elderly       | Unclear         | OCD                  | 44                              | 43                                 | 1                             |
| <b>JF78</b> | Unclear        | Unclear                | Adults/Elderly       | Community       | PTSD                 | 27                              | 27                                 | 1                             |
| <b>JF80</b> | USA            | 50                     | Adults/Elderly       | Outpatients     | GAD                  | 104                             | 53                                 | 1                             |
| <b>JF82</b> | Brazil         | 1                      | Children/Adolescents | Unclear         | More than 1 AnxDis   | 11                              | 10                                 | 1                             |

|             |             |         |                      |             |       |     |     |   |
|-------------|-------------|---------|----------------------|-------------|-------|-----|-----|---|
| <b>JF83</b> | Several     | 21      | Adults/Elderly       | Outpatients | GAD   | 189 | 184 | 1 |
| <b>JF87</b> | USA         | 17      | Adults/Elderly       | Outpatients | GAD   | 98  | 174 | 2 |
| <b>JF88</b> | USA         | NA      | Adults/Elderly       | Outpatients | GAD   | 157 | 158 | 1 |
| <b>JF89</b> | USA         | 23      | Adults/Elderly       | Mixed       | GAD   | 140 | 139 | 1 |
| <b>JF9</b>  | Several     | 42      | Adults/Elderly       | Outpatients | GAD   | 175 | 338 | 2 |
| <b>JF94</b> | Japan       | 86      | Adults/Elderly       | Outpatients | SAD   | 196 | 392 | 2 |
| <b>LM10</b> | Netherlands | 1       | Adults/Elderly       | Outpatients | Panic | 19  | 20  | 1 |
| <b>LM23</b> | US          | 1       | Adults/Elderly       | Outpatients | PTSD  | 6   | 7   | 1 |
| <b>LM24</b> | US          | 1       | Adults/Elderly       | Outpatients | PTSD  | 10  | 8   | 1 |
| <b>LM34</b> | USA         | 10      | Adults/Elderly       | Outpatients | PTSD  | 83  | 86  | 1 |
| <b>LM37</b> | USA         | 14      | Adults/Elderly       | Outpatients | GAD   | 127 | 124 | 1 |
| <b>LM39</b> | USA         | 21      | Children/Adolescents | Unclear     | OCD   | 32  | 69  | 1 |
| <b>LM4</b>  | Several     | 56      | Adults/Elderly       | Outpatients | PTSD  | 168 | 161 | 1 |
| <b>LM40</b> | Several     | 36      | Children/Adolescents | Outpatients | OCD   | 105 | 98  | 1 |
| <b>LM42</b> | Spain       | 1       | Adults/Elderly       | Outpatients | SAD   | 16  | 17  | 1 |
| <b>LM48</b> | USA         | 4       | Adults/Elderly       | Outpatients | OCD   | 78  | 78  | 1 |
| <b>LM5</b>  | USA         | 2       | Adults/Elderly       | Outpatients | SAD   | 60  | 57  | 1 |
| <b>LM50</b> | USA         | 11      | Adults/Elderly       | Outpatients | OCD   | 84  | 241 | 3 |
| <b>LM54</b> | USA         | 42      | Adults/Elderly       | Outpatients | GAD   | 161 | 326 | 2 |
| <b>LM57</b> | USA         | 1       | Adults/Elderly       | Outpatients | PTSD  | 6   | 6   | 1 |
| <b>LM59</b> | USA         | NA      | Adults/Elderly       | Community   | Panic | 36  | 18  | 1 |
| <b>LM6</b>  | USA         | 12      | Adults/Elderly       | Outpatients | PTSD  | 108 | 100 | 1 |
| <b>LM60</b> | USA         | several | Adults/Elderly       | Unclear     | OCD   | 126 | 127 | 1 |
| <b>LM67</b> | USA         | NA      | Adults/Elderly       | Outpatients | OCD   | 20  | 18  | 1 |
| <b>LM69</b> | USA         | NA      | Adults/Elderly       | Outpatients | OCD   | 21  | 23  | 1 |

|              |         |    |                      |             |       |     |     |   |
|--------------|---------|----|----------------------|-------------|-------|-----|-----|---|
| <b>LM71</b>  | Japan   | 56 | Adults/Elderly       | Outpatients | OCD   | 94  | 94  | 1 |
| <b>LM72</b>  | Several | 47 | Adults/Elderly       | Mixed       | GAD   | 128 | 125 | 1 |
| <b>LM73</b>  | Several | 41 | Adults/Elderly       | Outpatients | SAD   | 177 | 181 | 1 |
| <b>LM74</b>  | Germany | 57 | Adults/Elderly       | Outpatients | GAD   | 136 | 137 | 1 |
| <b>LM76</b>  | USA     | 1  | Adults/Elderly       | Outpatients | SAD   | 6   | 6   | 1 |
| <b>LM86</b>  | Canada  | 15 | Adults/Elderly       | Outpatients | Panic | 62  | 62  | 1 |
| <b>LM95</b>  | China   | 1  | Adults/Elderly       | Outpatients | PTSD  | 36  | 36  | 1 |
| <b>MC1</b>   | USA     | 2  | Adults/Elderly       | Unclear     | SAD   | 55  | 54  | 1 |
| <b>MC10</b>  | Several | NA | Adults/Elderly       | Outpatients | SAD   | 184 | 186 | 1 |
| <b>MC12</b>  | Several | 56 | Adults/Elderly       | Outpatients | Panic | 168 | 175 | 1 |
| <b>MC13</b>  | Several | 22 | Adults/Elderly       | Outpatients | SAD   | 94  | 289 | 3 |
| <b>MC14</b>  | Several | 19 | Adults/Elderly       | Mixed       | SAD   | 138 | 133 | 1 |
| <b>MC15</b>  | USA     | 20 | Adults/Elderly       | Outpatients | SAD   | 204 | 211 | 1 |
| <b>MC16</b>  | USA     | 2  | Children/Adolescents | Unclear     | OCD   | 22  | 21  | 1 |
| <b>MC17</b>  | USA     | 26 | Adults/Elderly       | Outpatients | SAD   | 144 | 269 | 2 |
| <b>MC2</b>   | Several | 22 | Adults/Elderly       | Unclear     | Panic | 64  | 192 | 2 |
| <b>MC20a</b> | USA     | 7  | Adults/Elderly       | Outpatients | Panic | 44  | 127 | 1 |
| <b>MC20b</b> | USA     | 7  | Adults/Elderly       | Outpatients | Panic | 43  | 127 | 3 |
| <b>MC22</b>  | USA     | 72 | Adults/Elderly       | Unclear     | GAD   | 52  | 156 | 1 |
| <b>MC25</b>  | USA     | 48 | Children/Adolescents | Outpatients | SAD   | 148 | 137 | 1 |
| <b>MC26</b>  | USA     | 3  | Children/Adolescents | Outpatients | OCD   | 28  | 28  | 1 |
| <b>MC28</b>  | USA     | 12 | Children/Adolescents | Outpatients | OCD   | 95  | 92  | 1 |
| <b>MC3</b>   | UK      | 31 | Adults/Elderly       | Community   | GAD   | 122 | 122 | 1 |

|             |         |         |                      |             |                    |     |     |   |
|-------------|---------|---------|----------------------|-------------|--------------------|-----|-----|---|
| <b>MC31</b> | USA     | 59      | Adults/Elderly       | Outpatients | PTSD               | 186 | 365 | 2 |
| <b>MC32</b> | USA     | NA      | Adults/Elderly       | Unclear     | PTSD               | 27  | 25  | 1 |
| <b>MC33</b> | USA     | 43      | Adults/Elderly       | Unclear     | PTSD               | 88  | 323 | 2 |
| <b>MC34</b> | Several | 8       | Adults/Elderly       | Unclear     | PTSD               | 34  | 110 | 1 |
| <b>MC38</b> | USA     | 64      | Adults/Elderly       | Unclear     | GAD                | 212 | 203 | 1 |
| <b>MC39</b> | Unclear | Several | Adults/Elderly       | Unclear     | Panic              | 78  | 165 | 2 |
| <b>MC4</b>  | USA     | 1       | Adults/Elderly       | Mixed       | More than 1 AnxDis | 17  | 17  | 1 |
| <b>MC40</b> | Several | 9       | Adults/Elderly       | Outpatients | Panic              | 90  | 90  | 1 |
| <b>MC42</b> | Several | 13      | Adults/Elderly       | Unclear     | OCD                | 55  | 158 | 3 |
| <b>MC44</b> | Several | 76      | Adults/Elderly       | Outpatients | GAD                | 101 | 113 | 1 |
| <b>MC45</b> | Several | 53      | Adults/Elderly       | Unclear     | OCD                | 100 | 390 | 3 |
| <b>MC51</b> | Canada  | 3       | Adults/Elderly       | Outpatients | Panic              | 47  | 43  | 1 |
| <b>MC55</b> | Several | 33      | Adults/Elderly       | Outpatients | GAD                | 169 | 411 | 3 |
| <b>MC56</b> | Greece  | 4       | Adults/Elderly       | Outpatients | GAD                | 22  | 24  | 1 |
| <b>MC6</b>  | USA     | 1       | Adults/Elderly       | Mixed       | GAD                | 93  | 86  | 1 |
| <b>MC62</b> | Iran    | 1       | Adults/Elderly       | Outpatients | PTSD               | 35  | 35  | 1 |
| <b>MC73</b> | Several | 39      | Adults/Elderly       | Outpatients | Panic              | 157 | 467 | 3 |
| <b>MC77</b> | Several | 35      | Adults/Elderly       | Outpatients | GAD                | 163 | 161 | 1 |
| <b>MC79</b> | Several | 71      | Adults/Elderly       | Outpatients | Panic              | 156 | 478 | 3 |
| <b>MC81</b> | USA     | 1       | Adults/Elderly       | Outpatients | Panic              | 12  | 13  | 1 |
| <b>MC82</b> | USA     | 10      | Adults/Elderly       | Outpatients | Panic              | 88  | 88  | 1 |
| <b>MJ1</b>  | Unclear | 17      | Adults/Elderly       | Outpatients | SAD                | 135 | 126 | 1 |
| <b>MJ14</b> | USA     | 27      | Adults/Elderly       | Outpatients | GAD                | 159 | 168 | 1 |
| <b>MJ16</b> | USA     | 1       | Children/Adolescents | Outpatients | GAD                | 11  | 11  | 1 |
| <b>MJ17</b> | Germany | 2       | Adults/Elderly       | Outpatients | Panic              | 23  | 23  | 1 |

|             |                                                        |         |                      |             |       |     |     |   |
|-------------|--------------------------------------------------------|---------|----------------------|-------------|-------|-----|-----|---|
| <b>MJ2</b>  | USA                                                    | 15      | Adults/Elderly       | Outpatients | GAD   | 96  | 253 | 3 |
| <b>MJ22</b> | Scotland                                               | NA      | Adults/Elderly       | Outpatients | Panic | 37  | 36  | 1 |
| <b>MJ25</b> | United States, Canada                                  | Several | Adults/Elderly       | Unclear     | Panic | 445 | 444 | 1 |
| <b>MJ3</b>  | USA, Canada                                            | 50      | Adults/Elderly       | Outpatients | GAD   | 180 | 386 | 2 |
| <b>MJ36</b> | USA                                                    | Several | Adults/Elderly       | Outpatients | Panic | 119 | 247 | 2 |
| <b>MJ4</b>  | USA                                                    | 1       | Children/Adolescents | Outpatients | OCD   | 7   | 7   | 1 |
| <b>MJ42</b> | USA                                                    | 19      | Adults/Elderly       | Outpatients | SAD   | 134 | 261 | 2 |
| <b>MJ44</b> | Canada, Finland, France, Germany, South Africa, Sweden | 58      | Adults/Elderly       | Outpatients | OCD   | 115 | 351 | 3 |
| <b>MJ5</b>  | USA                                                    | 17      | Children/Adolescents | Outpatients | OCD   | 63  | 57  | 1 |
| <b>MJ53</b> | USA                                                    | 4       | Adults/Elderly       | Outpatients | SAD   | 44  | 48  | 1 |
| <b>MJ54</b> | USA, Canada                                            | 13      | Adults/Elderly       | Outpatients | SAD   | 93  | 94  | 1 |
| <b>MJ56</b> | USA, Mexico, South Africa                              | 32      | Children/Adolescents | Outpatients | GAD   | 137 | 135 | 1 |
| <b>MJ6</b>  | USA                                                    | 21      | Children/Adolescents | Outpatients | PTSD  | 62  | 67  | 1 |
| <b>MJ64</b> | USA                                                    | 1       | Adults/Elderly       | Outpatients | PTSD  | 10  | 48  | 2 |
| <b>MJ66</b> | USA, Canada                                            | 37      | Adults/Elderly       | Outpatients | PTSD  | 156 | 151 | 1 |
| <b>MJ70</b> | Canada                                                 | 10      | Adults/Elderly       | Outpatients | SAD   | 69  | 135 | 1 |
| <b>MJ71</b> | USA                                                    | NA      | Adults/Elderly       | Community   | PTSD  | 29  | 30  | 1 |
| <b>MJ73</b> | Netherlands                                            | 1       | Adults/Elderly       | Outpatients | SAD   | 13  | 15  | 1 |
| <b>MJ77</b> | Finland, Sweden, Netherlands, UK                       | 22      | Adults/Elderly       | Outpatients | Panic | 96  | 281 | 3 |

|              |                                                                       |         |                      |             |                       |     |     |   |
|--------------|-----------------------------------------------------------------------|---------|----------------------|-------------|-----------------------|-----|-----|---|
| <b>MJ78</b>  | USA, South Africa<br>Canda, Belgium                                   | 38      | Children/Adolescents | Outpatients | SAD                   | 157 | 165 | 1 |
| <b>MJ79</b>  | USA                                                                   | 6       | Children/Adolescents | Outpatients | More than 1<br>AnxDis | 76  | 133 | 1 |
| <b>MJ80</b>  | USA                                                                   | 5       | children/Adolescents | Outpatients | more than 1<br>AnxDis | 65  | 63  | 1 |
| <b>MJ84</b>  | France, Germany,<br>UK, Ireland,<br>Netherlands,<br>South Africa, USA | 42      | Adults/Elderly       | Outpatients | SAD                   | 151 | 149 | 1 |
| <b>MJ85</b>  | Netherlands                                                           | NA      | adults/Elderly       | Outpatients | Panic                 | 20  | 20  | 1 |
| <b>MJ89</b>  | China                                                                 | 9       | Adults/Elderly       | Outpatients | GAD                   | 102 | 108 | 1 |
| <b>MJ93</b>  | Israel                                                                | 3       | Adults/Elderly       | Outpatients | PTSD                  | 19  | 23  | 1 |
| <b>MJ94</b>  | Several                                                               | Several | Adults/Elderly       | Outpatients | OCD                   | 99  | 201 | 1 |
| <b>MJ96</b>  | USA                                                                   | NA      | Adults/Elderly       | Outpatients | OCD                   | 9   | 10  | 1 |
| <b>MJ97</b>  | USA                                                                   | NA      | Adults/Elderly       | Outpatients | OCD                   | 9   | 10  | 1 |
| <b>UNG09</b> | Several                                                               | 27      | Adults/Elderly       | Outpatients | SAD                   | 71  | 36  | 1 |
| <b>UNG1</b>  | USA                                                                   | 25      | Adults/Elderly       | Outpatients | GAD                   | 128 | 124 | 1 |
| <b>UNG10</b> | Sweden                                                                | 1       | Adults/Elderly       | Outpatients | SAD                   | 12  | 12  | 1 |
| <b>UNG11</b> | USA                                                                   | 15      | Adults/Elderly       | Outpatients | OCD                   | 88  | 260 | 3 |
| <b>UNG12</b> | USA                                                                   | 13      | Adults/Elderly       | Outpatients | OCD                   | 77  | 82  | 1 |
| <b>UNG17</b> | Several                                                               | 16      | Adults/Elderly       | Outpatients | SAD                   | 62  | 66  | 1 |
| <b>UNG2</b>  | USA                                                                   | 19      | Adults/Elderly       | Outpatients | GAD                   | 138 | 143 | 1 |
| <b>UNG3</b>  | Japan                                                                 | 34      | Children/Adolescents | Unclear     | OCD                   | 18  | 19  | 1 |
| <b>UNG6</b>  | Several                                                               | 50      | Adults/Elderly       | Outpatients | GAD                   | 183 | 181 | 1 |
| <b>UNG7</b>  | USA                                                                   | 32      | Adults/Elderly       | Unclear     | GAD                   | 163 | 164 | 1 |
| <b>UNG8</b>  | USA                                                                   | 1       | Adults/Elderly       | Outpatients | PTSD                  | 11  | 11  | 1 |
| <b>UPD3</b>  | USA                                                                   | 1       | Adults/Elderly       | Outpatients | SAD                   | 30  | 30  | 1 |

|             |     |   |                      |             |     |    |    |   |
|-------------|-----|---|----------------------|-------------|-----|----|----|---|
| <b>UPD8</b> | USA | 1 | Children/Adolescents | Outpatients | GAD | 25 | 26 | 1 |
|-------------|-----|---|----------------------|-------------|-----|----|----|---|



**S1Table E:** Intervention information

| <b>id</b>   | <b>Drug(s)<br/>mean dose or<br/>min. to max. dose</b>          | <b>Drug(s) Class</b> | <b>Comparator</b> | <b>Number of<br/>Visits</b> | <b>Outcome Week</b> | <b>Concomitant<br/>use of<br/>Benzodiazepines</b> | <b>Placebo (led in)<br/>exclusion</b> |
|-------------|----------------------------------------------------------------|----------------------|-------------------|-----------------------------|---------------------|---------------------------------------------------|---------------------------------------|
| <b>JF10</b> | venlafaxine - 192mg<br>paroxetine - 44mg                       | SNRI,SSRI            | placebo           | 9                           | 12-14 week          | not informed                                      | no                                    |
| <b>JF11</b> | paroxetine - 20 to 50mg                                        | SSRI                 | placebo           | 7                           | 12-14 week          | no                                                | no                                    |
| <b>JF15</b> | fluvoxamine - 180mg                                            | SSRI                 | placebo           | 9                           | 9-11 week           | yes                                               | not informed                          |
| <b>JF16</b> | fluvoxamine - 100 to 300mg                                     | SSRI                 | placebo           | 9                           | 6-8 week            | yes                                               | yes                                   |
| <b>JF20</b> | paroxetine - 20 to 60mg                                        | SSRI                 | placebo           | not informed                | 12-14 week          | no                                                | yes                                   |
| <b>JF22</b> | escitalopram - 5mg<br>escitalopram - 20mg<br>paroxetine - 20mg | SSRI                 | head-to-head      | 10                          | 12-14 week          | no                                                | yes                                   |
| <b>JF25</b> | paroxetine - 35mg                                              | SSRI                 | placebo           | 8                           | 12-14 week          | no                                                | yes                                   |
| <b>JF28</b> | paroxetine - 10mg<br>paroxetine - 20mg<br>paroxetine - 40mg    | SSRI                 | different dose    | 8                           | 9-11 week           | yes                                               | yes                                   |
| <b>JF29</b> | paroxetine - 20mg                                              | SSRI                 | placebo           | 9                           | 6-8 week            | no                                                | not informed                          |
| <b>JF3</b>  | duloxetine - 30 to 120mg                                       | SNRI                 | placebo           | 5                           | 9-11 week           | no                                                | no                                    |
| <b>JF34</b> | fluoxetine - 10 to 40mg                                        | SSRI                 | placebo           | 13                          | 12-14 week          | not informed                                      | not informed                          |
| <b>JF42</b> | fluoxetine - 20mg                                              | SSRI                 | placebo           | 13                          | 12-14 week          | not informed                                      | not informed                          |
| <b>JF45</b> | fluvoxamine - 50 to 300mg                                      | SSRI                 | placebo           | not informed                | 6-8 week            | not informed                                      | yes                                   |
| <b>JF56</b> | venlafaxine - 163mg                                            | SNRI                 | placebo           | 9                           | 9-11 week           | not informed                                      | yes                                   |

|             |                                            |      |                |              |            |              |              |
|-------------|--------------------------------------------|------|----------------|--------------|------------|--------------|--------------|
| <b>JF59</b> | sertraline - 133mg                         | SSRI | placebo        | 9            | 12-14 week | not informed | yes          |
| <b>JF61</b> | sertraline - 149mg                         | SSRI | placebo        | 9            | 9-11 week  | no           | no           |
| <b>JF7</b>  | sertraline - 95mg                          | SSRI | placebo        | 7            | 12-14 week | no           | yes          |
| <b>JF72</b> | sertraline - 50 to 200mg                   | SSRI | placebo        | 6            | 6-8 week   | yes          | yes          |
| <b>JF78</b> | fluoxetine - 30mg                          | SSRI | placebo        | 9            | 12-14 week | not informed | not informed |
| <b>JF80</b> | escitalopram - 10 to 20mg                  | SSRI | placebo        | not informed | 6-8 week   | no           | not informed |
| <b>JF82</b> | fluoxetine - 35mg                          | SSRI | placebo        | not informed | 12-14 week | not informed | not informed |
| <b>JF83</b> | sertraline - 50 to 100mg                   | SSRI | placebo        | 7            | 12-14 week | no           | yes          |
| <b>JF87</b> | venlafaxine - 75mg<br>venlafaxine - 150mg  | SNRI | placebo        | 7            | 6-8 week   | no           | yes          |
| <b>JF88</b> | escitalopram - 12mg                        | SSRI | placebo        | 6            | 6-8 week   | no           | yes          |
| <b>JF89</b> | fluvoxamine - 174mg                        | SSRI | placebo        | 10           | 12-14 week | not informed | yes          |
| <b>JF9</b>  | duloxetine - 60mg<br>duloxetine - 120mg    | SNRI | different dose | 6            | 9-11 week  | no           | yes          |
| <b>JF94</b> | escitalopram - 10mg<br>escitalopram - 20mg | SSRI | different dose | 7            | 12-14 week | not informed | not informed |
| <b>LM10</b> | fluvoxamine - 75 to 150mg                  | SSRI | placebo        | 6            | 6-8 week   | not informed | no           |
| <b>LM23</b> | paroxetine – 12,5 to 62,5mg                | SSRI | placebo        | NA           | 12-14 week | not informed | not informed |
| <b>LM24</b> | paroxetine – 12,5 to 62,5mg                | SSRI | placebo        | 4            | 6-8 week   | not informed | not informed |
| <b>LM34</b> | sertraline - 135mg                         | SSRI | placebo        | 8            | 12-14 week | no           | yes          |
| <b>LM37</b> | venlafaxine - 75 to 225mg                  | SNRI | placebo        | 12           | 12-14 week | no           | no           |
| <b>LM39</b> | fluoxetine - 25mg                          | SSRI | placebo        | 10           | 12-14 week | not informed | no           |

|             |                                                                |      |                |              |            |              |              |
|-------------|----------------------------------------------------------------|------|----------------|--------------|------------|--------------|--------------|
| <b>LM4</b>  | venlafaxine - 182mg                                            | SNRI | placebo        | 8            | 21-26 week | unclear      | no           |
| <b>LM40</b> | paroxetine - 25mg                                              | SSRI | placebo        | 7            | 9-11 week  | not informed | no           |
| <b>LM42</b> | paroxetine - 20mg                                              | SSRI | placebo        | 4            | 6-8 week   | unclear      | no           |
| <b>LM48</b> | fluvoxamine - 230mg                                            | SSRI | placebo        | 5            | 9-11 week  | yes          | no           |
| <b>LM5</b>  | fluoxetine - 44mg                                              | SSRI | placebo        | 4            | 12-14 week | not informed | no           |
| <b>LM50</b> | sertraline - 50mg<br>sertraline - 100mg<br>sertraline - 2000mg | SSRI | different dose | 8            | 12-14 week | no           | yes          |
| <b>LM54</b> | duloxetine - 107mg<br>venlafaxine - 184mg                      | SNRI | head-to-head   | 7            | 9-11 week  | not informed | not informed |
| <b>LM57</b> | fluoxetine - 48mg                                              | SSRI | placebo        | 8            | 12-14 week | no           | no           |
| <b>LM59</b> | fluvoxamine - 205mg                                            | SSRI | placebo        | 9            | 6-8 week   | no           | no           |
| <b>LM6</b>  | sertraline - 146mg                                             | SSRI | placebo        | 9            | 12-14 week | no           | yes          |
| <b>LM60</b> | fluvoxamine - 271mg                                            | SSRI | placebo        | 7            | 12-14 week | no           | no           |
| <b>LM67</b> | fluvoxamine - 294mg                                            | SSRI | placebo        | 6            | 9-11 week  | no           | no           |
| <b>LM69</b> | fluoxetine - 78mg                                              | SSRI | placebo        | 6            | 9-11 week  | no           | no           |
| <b>LM71</b> | paroxetine - 40 to 50mg                                        | SSRI | placebo        | 6            | 12-14 week | not informed | no           |
| <b>LM72</b> | venlafaxine - 155mg                                            | SNRI | placebo        | 7            | 6-8 week   | not informed | no           |
| <b>LM73</b> | escitalopram - 18mg                                            | SSRI | placebo        | 8            | 12-14 week | no           | yes          |
| <b>LM74</b> | paroxetine - 20mg                                              | SSRI | placebo        | 6            | 9-11 week  | no           | no           |
| <b>LM76</b> | sertraline - 134mg                                             | SSRI | placebo        | 4            | 9-11 week  | not informed | not informed |
| <b>LM86</b> | sertraline - 116mg                                             | SSRI | placebo        | 8            | 12-14 week | yes          | no           |
| <b>LM95</b> | sertraline - 135mg                                             | SSRI | placebo        | not informed | 12-14 week | not informed | not informed |
| <b>MC1</b>  | fluoxetine - 10 to 40mg                                        | SSRI | placebo        | 10           | 12-14 week | unclear      | no           |
| <b>MC10</b> | paroxetine - 32mg                                              | SSRI | placebo        | 8            | 12-14 week | no           | unclear      |
| <b>MC12</b> | venlafaxine - 188mg                                            | SNRI | placebo        | 8            | 9-11 week  | no           | yes          |

|              |                                                                |           |                |              |            |              |              |
|--------------|----------------------------------------------------------------|-----------|----------------|--------------|------------|--------------|--------------|
| <b>MC13</b>  | paroxetine - 20mg<br>paroxetine - 40mg<br>paroxetine - 60mg    | SSRI      | different dose | 8            | 12-14 week | no           | yes          |
| <b>MC14</b>  | venlafaxine - 165mg                                            | SNRI      | placebo        | 9            | 12-14 week | no           | yes          |
| <b>MC15</b>  | sertraline - 159mg                                             | SSRI      | placebo        | 8            | 12-14 week | no           | yes          |
| <b>MC16</b>  | fluoxetine - 65mg                                              | SSRI      | placebo        | 9            | 6-8 week   | no           | no           |
| <b>MC17</b>  | venlafaxine - 202mg<br>paroxetine - 46mg                       | SNRI,SSRI | head-to-head   | not informed | 12-14 week | no           | yes          |
| <b>MC2</b>   | citalopram - 10 to 15mg<br>citalopram - 20 to 40mg             | SSRI      | different dose | not informed | 12-14 week | yes          | yes          |
| <b>MC20a</b> | sertraline - 50 to 200mg                                       | SSRI      | different dose | 9            | 12-14 week | no           | yes          |
| <b>MC20b</b> | sertraline - 50mg<br>sertraline - 100mg<br>sertraline - 2000mg | SSRI      | different dose | 9            | 12-14 week | no           | yes          |
| <b>MC22</b>  | duloxetine - 60mg                                              | SNRI      | head-to-head   | 6            | 6-8 week   | unclear      | not informed |
| <b>MC25</b>  | venlafaxine - 142mg                                            | SNRI      | different dose | 9            | 12-14 week | no           | not informed |
| <b>MC26</b>  | sertraline - 170mg                                             | SSRI      | placebo        | 9            | 12-14 week | no           | not informed |
| <b>MC28</b>  | sertraline - 167mg                                             | SSRI      | placebo        | 8            | 12-14 week | no           | yes          |
| <b>MC3</b>   | venlafaxine - 110mg                                            | SNRI      | placebo        | 6            | 6-8 week   | no           | no           |
| <b>MC31</b>  | paroxetine - 20mg<br>paroxetine - 40mg                         | SSRI      | different dose | 7            | 12-14 week | no           | yes          |
| <b>MC32</b>  | paroxetine - 40mg                                              | SSRI      | placebo        | 3            | 9-11 week  | no           | yes          |
| <b>MC33</b>  | fluoxetine - 20mg<br>fluoxetine - 40mg                         | SSRI      | different dose | not informed | 12-14 week | not informed | no           |
| <b>MC34</b>  | fluoxetine - 65mg                                              | SSRI      | placebo        | not informed | 12-14 week | not informed | no           |
| <b>MC38</b>  | escitalopram - 10mg                                            | SSRI      | placebo        | not informed | 6-8 week   | not informed | no           |

|             |                                                                |           |                |              |                       |              |              |
|-------------|----------------------------------------------------------------|-----------|----------------|--------------|-----------------------|--------------|--------------|
| <b>MC39</b> | fluoxetine - 10mg<br>fluoxetine - 20mg                         | SSRI      | different dose | 6            | 9-11 week             | no           | no           |
| <b>MC4</b>  | citalopram - 10 to 30mg                                        | SSRI      | placebo        | 7            | 6-8 week              | yes          | no           |
| <b>MC40</b> | fluoxetine - 30mg                                              | SSRI      | placebo        | 7            | 12-14 week            | not informed | unclear      |
| <b>MC42</b> | fluoxetine - 20mg<br>fluoxetine - 40mg<br>fluoxetine - 60mg    | SSRI      | different dose | 7            | 6-8 week<br>9-11 week | yes          | yes          |
| <b>MC44</b> | venlafaxine - 75mg                                             | SNRI      | placebo        | 6            | 6-8 week              | no           | no           |
| <b>MC45</b> | citalopram - 20mg<br>citalopram - 40mg<br>citalopram - 60mg    | SSRI      | different dose | 6            | 12-14 week            | no           | yes          |
| <b>MC51</b> | fluvoxamine - 171mg                                            | SSRI      | placebo        | 9            | 6-8 week              | yes          | yes          |
| <b>MC55</b> | duloxetine - 20mg<br>duloxetine - 90mg<br>venlafaxine - 151mg  | SNRI      | head-to-head   | not informed | 9-11 week             | no           | no           |
| <b>MC56</b> | venlafaxine - 75 to 150mg                                      | SNRI      | placebo        | 7            | 9-11 week             | no           | yes          |
| <b>MC6</b>  | escitalopram - 10 to 20mg                                      | SSRI      | placebo        | 9            | 12-14 week            | yes          | no           |
| <b>MC62</b> | sertraline - 140mg                                             | SSRI      | placebo        | 7            | 9-11 week             | yes          | not informed |
| <b>MC73</b> | venlafaxine - 75mg<br>venlafaxine - 225mg<br>paroxetine - 40mg | SNRI,SSRI | head-to-head   | 9            | 12-14 week            | no           | yes          |
| <b>MC77</b> | paroxetine - 27mg                                              | SSRI      | placebo        | 4            | 6-8 week              | no           | yes          |
| <b>MC79</b> | venlafaxine - 75mg<br>venlafaxine - 150mg<br>paroxetine - 40mg | SNRI,SSRI | head-to-head   | 9            | 12-14 week            | no           | yes          |
| <b>MC81</b> | venlafaxine - 166mg                                            | SNRI      | placebo        | 9            | 6-8 week              | not informed | yes          |

|             |                                                                  |      |                |    |            |              |     |
|-------------|------------------------------------------------------------------|------|----------------|----|------------|--------------|-----|
| <b>MC82</b> | sertraline - 131mg                                               | SSRI | placebo        | 8  | 9-11 week  | no           | yes |
| <b>MJ1</b>  | venlafaxine - 165mg                                              | SNRI | placebo        | 9  | 12-14 week | no           | yes |
| <b>MJ14</b> | duloxetine - 102mg                                               | SNRI | placebo        | 6  | 9-11 week  | no           | yes |
| <b>MJ16</b> | sertraline - 50mg                                                | SSRI | placebo        | 10 | 9-11 week  | not informed | no  |
| <b>MJ17</b> | fluvoxamine - 160mg                                              | SSRI | placebo        | 7  | 6-8 week   | not informed | no  |
| <b>MJ2</b>  | venlafaxine - 75mg<br>venlafaxine - 150mg<br>venlafaxine - 225mg | SNRI | different dose | 8  | 6-8 week   | no           | no  |
| <b>MJ22</b> | fluvoxamine - 100 to 150mg                                       | SSRI | placebo        | 8  | 12-14 week | not informed | yes |
| <b>MJ25</b> | paroxetine - 50mg                                                | SSRI | placebo        | 11 | 9-11 week  | no           | yes |
| <b>MJ3</b>  | paroxetine - 20mg<br>paroxetine - 40mg                           | SSRI | different dose | 7  | 6-8 week   | no           | yes |
| <b>MJ36</b> | escitalopram - 11mg<br>citalopram - 21mg                         | SSRI | head-to-head   | 7  | 9-11 week  | no           | yes |
| <b>MJ4</b>  | fluoxetine - 20mg                                                | SSRI | placebo        | 3  | 6-8 week   | not informed | no  |
| <b>MJ42</b> | venlafaxine - 72mg<br>venlafaxine - 214mg                        | SNRI | different dose | 12 | 12-14 week | not informed | yes |
| <b>MJ44</b> | escitalopram - 10mg<br>escitalopram - 20mg<br>paroxetine - 40mg  | SSRI | head-to-head   | 11 | 12-14 week | no           | no  |
| <b>MJ5</b>  | fluvoxamine - 165mg                                              | SSRI | placebo        | 8  | 9-11 week  | no           | yes |
| <b>MJ53</b> | fluvoxamine - 202mg                                              | SSRI | placebo        | 9  | 12-14 week | yes          | no  |
| <b>MJ54</b> | paroxetine - 37mg                                                | SSRI | placebo        | 8  | 12-14 week | not informed | yes |
| <b>MJ56</b> | duloxetine - 54mg                                                | SNRI | placebo        | 6  | 9-11 week  | no           | no  |
| <b>MJ6</b>  | sertraline - 106mg                                               | SSRI | placebo        | 6  | 9-11 week  | no           | no  |
| <b>MJ64</b> | citalopram - 36mg<br>sertraline - 134mg                          | SSRI | head-to-head   | 8  | 9-11 week  | yes          | no  |

|              |                                                                               |      |                |              |                        |              |              |
|--------------|-------------------------------------------------------------------------------|------|----------------|--------------|------------------------|--------------|--------------|
| <b>MJ66</b>  | paroxetine - 28mg                                                             | SSRI | placebo        | 7            | 12-14 week             | not informed | yes          |
| <b>MJ70</b>  | sertraline - 147mg                                                            | SSRI | placebo        | 9            | 18-20 week             | no           | yes          |
| <b>MJ71</b>  | fluoxetine - 30mg                                                             | SSRI | placebo        | not informed | 6-8 week               | not informed | no           |
| <b>MJ73</b>  | fluvoxamine - 50 to 150mg                                                     | SSRI | placebo        | 6            | 12-14 week             | yes          | no           |
| <b>MJ77</b>  | citalopram - 10 to 15mg<br>citalopram - 20 to 40mg<br>citalopram - 40 to 60mg | SSRI | different dose | 9            | 6-8 week               | yes          | yes          |
| <b>MJ78</b>  | paroxetine - 33mg                                                             | SSRI | placebo        | 10           | 15-17 week             | not informed | no           |
| <b>MJ79</b>  | sertraline - 25 to 200mg                                                      | SSRI | placebo        | 9            | 12-14 week             | not informed | no           |
| <b>MJ80</b>  | fluvoxamine - 300mg                                                           | SSRI | placebo        | 8            | 6-8 week               | no           | no           |
| <b>MJ84</b>  | fluvoxamine - 209mg                                                           | SSRI | placebo        | 7            | 12-14 week             | not informed | no           |
| <b>MJ85</b>  | fluvoxamine - 300mg                                                           | SSRI | placebo        | 7            | 6-8 week               | not informed | not informed |
| <b>MJ89</b>  | duloxetine - 60 to 120mg                                                      | SNRI | placebo        | not informed | 15-17 week             | yes          | no           |
| <b>MJ93</b>  | sertraline - 120mg                                                            | SSRI | placebo        | 6            | 9-11 week              | yes          | yes          |
| <b>MJ94</b>  | paroxetine - 38mg                                                             | SSRI | placebo        | 4            | 12-14 week             | yes          | yes          |
| <b>MJ96</b>  | sertraline - 200mg                                                            | SSRI | placebo        | 7            | 9-11 week              | no           | no           |
| <b>MJ97</b>  | Sertraline - 200mg                                                            | SSRI | placebo        | 7            | 9-11 week              | no           | no           |
| <b>UNG09</b> | paroxetine - 20 to 30mg                                                       | SSRI | placebo        | not informed | 12-14 week             | not informed | not informed |
| <b>UNG1</b>  | escitalopram - 10 to 20mg                                                     | SSRI | placebo        | 6            | 6-8 week               | no           | yes          |
| <b>UNG10</b> | paroxetine - 8mg                                                              | SSRI | placebo        | not informed | 12-14 week<br>6-8 week | not informed | not informed |

|              |                                                             |      |         |              |            |              |              |
|--------------|-------------------------------------------------------------|------|---------|--------------|------------|--------------|--------------|
| <b>UNG11</b> | paroxetine - 20mg<br>paroxetine - 40mg<br>paroxetine - 60mg | SSRI | placebo | 8            | 12-14 week | no           | yes          |
| <b>UNG12</b> | paroxetine - 20 to 60mg                                     | SSRI | placebo | not informed | 12-14 week | no           | not informed |
| <b>UNG17</b> | paroxetine - 8mg                                            | SSRI | placebo | not informed | 12-14 week | not informed | not informed |
| <b>UNG2</b>  | escitalopram - 10 to 20mg                                   | SSRI | Placebo | 6            | 6-8 week   | no           | yes          |
| <b>UNG3</b>  | fluvoxamine - 50 to 150mg                                   | SSRI | Placebo | 5            | 9-11 week  | not informed | not informed |
| <b>UNG6</b>  | paroxetine - 20 to 50mg                                     | SSRI | Placebo | 8            | 6-8 week   | no           | yes          |
| <b>UNG7</b>  | paroxetine - 12 to 38mg                                     | SSRI | Placebo | 8            | 6-8 week   | no           | yes          |
| <b>UNG8</b>  | paroxetine - 42mg                                           | SSRI | Placebo | 12           | 12-14 week | no           | not informed |
| <b>UPD3</b>  | desvenlafaxine - 79mg                                       | SNRI | Placebo | 8            | 12-14 week | no           | no           |
| <b>UPD8</b>  | escitalopram - 15 to 20mg                                   | SSRI | Placebo | 6            | 12-14 week | no           | not informed |



**S1Table F:** Outcomes assessment information

| id   | Scale Abbreviation<br>(Included Outcomes) | Associated Factors             | DSM Factors                    | Type of Analysis | Effect Size<br>( $\eta^2$ ) | Variance<br>( $\sigma^2$ ) |
|------|-------------------------------------------|--------------------------------|--------------------------------|------------------|-----------------------------|----------------------------|
| JF10 | LSAS                                      | social anxiety                 | social anxiety                 | LOCF             | -0,9542917                  | 0,01481315                 |
| JF10 | SPIN                                      | social anxiety                 | social anxiety                 | LOCF             | -0,5782233                  | 0,01263008                 |
| JF11 | BSPS                                      | social anxiety                 | social anxiety                 | LOCF             | -0,5757419                  | 0,0347029                  |
| JF11 | FNE                                       | fear of negative evaluation    | social anxiety                 | LOCF             | -0,3519109                  | 0,03254001                 |
| JF11 | LSAS                                      | social anxiety                 | social anxiety                 | LOCF             | -0,4118047                  | 0,03301649                 |
| JF15 | LSAS                                      | social anxiety                 | social anxiety                 | LOCF             | -1,0019963                  | 0,02249436                 |
| JF16 | CAS                                       | anxiety (general)              | GAD                            | LOCF             | -0,721452                   | 0,01852891                 |
| JF16 | CAS_P                                     | panic                          | panic                          | LOCF             | -1,3639951                  | 0,02558149                 |
| JF16 | CGI-S                                     | clinical impression (severity) | psychiatric symptoms (general) | LOCF             | -1,115996                   | 0,02234446                 |
| JF16 | PAAS_PAF_WK_N                             | panic attack (full)            | panic                          | LOCF             | -0,2768362                  | 0,01619283                 |
| JF16 | PAAS_PAL_WK_N                             | panic attack (limited)         | panic                          | LOCF             | -0,2314658                  | 0,01607145                 |
| JF16 | PANICSS                                   | panic attack                   | panic                          | LOCF             | -0,8502827                  | 0,01959463                 |
| JF20 | CGI-S                                     | clinical impression (severity) | psychiatric symptoms (general) | LOCF             | -0,8575966                  | 0,04789067                 |
| JF20 | HAM_A                                     | anxiety (general)              | GAD                            | LOCF             | -0,521877                   | 0,04195328                 |
| JF20 | MSPRS_A                                   | anxiety (general)              | GAD                            | LOCF             | -0,5143555                  | 0,04185335                 |
| JF20 | MSPRS_AGO                                 | agoraphobia                    | agoraphobia                    | LOCF             | -0,2634705                  | 0,0393515                  |
| JF20 | OPS                                       | phobia                         | phobia                         | LOCF             | -0,6237066                  | 0,04344885                 |
| JF20 | PAAS_AA                                   | anticipatory anxiety           | GAD                            | LOCF             | -0,3835215                  | 0,04034729                 |
| JF20 | PAAS_PA_WK_N                              | panic attack                   | panic                          | LOCF             | -0,3534824                  | 0,04006346                 |
| JF20 | PGI                                       | patient impression (general)   | psychiatric symptoms (general) | LOCF             | -0,4900552                  | 0,04154044                 |
| JF22 | HAM_A                                     | anxiety (general)              | GAD                            | LOCF             | -3,070144                   | 0,04469707                 |
| JF25 | CGI-S                                     | clinical impression (severity) | psychiatric symptoms (general) | LOCF             | -0,742756                   | 0,01176055                 |
| JF25 | LSAS                                      | social anxiety                 | social anxiety                 | LOCF             | -0,7553815                  | 0,01182318                 |
| JF25 | SADS                                      | social anxiety                 | social anxiety                 | LOCF             | -0,8112464                  | 0,01211298                 |

|             |                |                                |                                |         |            |            |
|-------------|----------------|--------------------------------|--------------------------------|---------|------------|------------|
| <b>JF28</b> | CGI-S          | clinical impression (severity) | psychiatric symptoms (general) | LOCF    | -1,9778461 | 0,05008605 |
| <b>JF28</b> | FQ             | fear                           | phobia                         | LOCF    | -0,8900308 | 0,02747938 |
| <b>JF28</b> | HAM_A          | anxiety (general)              | GAD                            | LOCF    | -0,8940948 | 0,02753192 |
| <b>JF28</b> | MSPRS_AV       | avoidance (phobia)             | phobia                         | LOCF    | -0,6293147 | 0,02460896 |
| <b>JF28</b> | PA_INT         | panic attack (full)            | panic                          | LOCF    | -1,249166  | 0,03304649 |
| <b>JF28</b> | PAAS_SIPA_WK_N | situational panic attack       | panic                          | LOCF    | -0,2163269 | 0,02207824 |
| <b>JF28</b> | PAAS_SPA_WK_N  | panic attack                   | panic                          | LOCF    | -0,2066406 | 0,02204855 |
| <b>JF28</b> | PAAS_AA_T_P    | anticipatory anxiety           | GAD                            | LOCF    | -0,1718206 | 0,02195306 |
| <b>JF28</b> | PAAS_PA_WK_N   | panic attack                   | panic                          | LOCF    | -0,3122915 | 0,02244584 |
| <b>JF28</b> | PAAS_PAF_WK_N  | panic attack (full)            | panic                          | LOCF    | -0,2304694 | 0,02212403 |
| <b>JF29</b> | CGI-S          | clinical impression (severity) | psychiatric symptoms (general) | LOCF    | -2,1781147 | 0,01784374 |
| <b>JF29</b> | HAM_A          | anxiety (general)              | GAD                            | LOCF    | -2,785735  | 0,02479336 |
| <b>JF3</b>  | HADS_A         | anxiety (general)              | GAD                            | LOCF    | -1,6877941 | 0,02088803 |
| <b>JF3</b>  | HAM_A          | anxiety (general)              | GAD                            | LOCF    | -1,6389771 | 0,02030802 |
| <b>JF34</b> | CGI-S          | clinical impression (severity) | psychiatric symptoms (general) | LOCF    | -0,7282637 | 0,055162   |
| <b>JF42</b> | PARS           | anxiety (general)(child)       | GAD                            | Unclear | -1,5663942 | 0,07369717 |
| <b>JF42</b> | SCARED         | anxiety (general)(child)       | GAD                            | Unclear | -0,8288436 | 0,04982408 |
| <b>JF42</b> | SCARED_P       | anxiety (general)(child)       | GAD                            | Unclear | -1,076896  | 0,05621223 |
| <b>JF45</b> | CAS            | anxiety (general)              | GAD                            | Unclear | -0,8975092 | 0,07611046 |
| <b>JF45</b> | PASS           | panic attack                   | panic                          | Unclear | -0,5292229 | 0,06560154 |
| <b>JF56</b> | CAS            | anxiety (general)              | GAD                            | LOCF    | -1,1879758 | 0,01225357 |
| <b>JF56</b> | CGI-S          | clinical impression (severity) | psychiatric symptoms (general) | LOCF    | -2,153088  | 0,02121052 |
| <b>JF56</b> | FQ_F           | fear (phobia)                  | phobia                         | LOCF    | -0,5897668 | 0,00929951 |
| <b>JF56</b> | FQ_AV          | avoidance (phobia)             | phobia                         | LOCF    | -0,4292082 | 0,00884505 |
| <b>JF59</b> | CAPS           | PTSD                           | PTSD                           | LOCF    | -1,3000151 | 0,02521527 |
| <b>JF59</b> | CAPS_AF        | PTSD                           | PTSD                           | LOCF    | -0,7489267 | 0,01914458 |
| <b>JF59</b> | CGI-S          | clinical impression (severity) | psychiatric symptoms (general) | LOCF    | -1,1020243 | 0,02265837 |
| <b>JF59</b> | DTS            | PTSD                           | PTSD                           | LOCF    | -0,5815359 | 0,01794723 |
| <b>JF59</b> | IES            | PTSD                           | PTSD                           | LOCF    | -0,785729  | 0,01944823 |

|             |           |                                |                                |                           |            |            |
|-------------|-----------|--------------------------------|--------------------------------|---------------------------|------------|------------|
| <b>JF61</b> | CGI-S     | clinical impression (severity) | psychiatric symptoms (general) | Mixed/Hierarchical/Random | -2,7676414 | 0,03135247 |
| <b>JF61</b> | HAM_A     | anxiety (general)              | GAD                            | Mixed/Hierarchical/Random | -4,369773  | 0,06498505 |
| <b>JF7</b>  | CGI-S     | clinical impression (severity) | psychiatric symptoms (general) | LOCF                      | -1,469546  | 0,0135778  |
| <b>JF7</b>  | HADS_A    | anxiety (general)              | GAD                            | LOCF                      | -0,7847475 | 0,00951534 |
| <b>JF7</b>  | HAM_A     | anxiety (general)              | GAD                            | LOCF                      | -1,6261643 | 0,01485371 |
| <b>JF72</b> | CGI-S     | clinical impression (severity) | psychiatric symptoms (general) | LOCF                      | -0,2701707 | 0,03492037 |
| <b>JF72</b> | MOCI      | OCD                            | OCD                            | LOCF                      | -0,1068618 | 0,03422068 |
| <b>JF72</b> | NIMH_GOCS | OCD                            | OCD                            | LOCF                      | -0,3499939 | 0,03548291 |
| <b>JF72</b> | YBOCS     | OCD                            | OCD                            | LOCF                      | -0,2383622 | 0,03473655 |
| <b>JF78</b> | DTS       | PTSD                           | PTSD                           | LOCF                      | -1,1624368 | 0,08057888 |
| <b>JF78</b> | DUKE      | PTSD                           | PTSD                           | LOCF                      | -0,9708263 | 0,07300933 |
| <b>JF78</b> | SIP       | PTSD                           | PTSD                           | LOCF                      | -1,6575083 | 0,10643211 |
| <b>JF78</b> | SVS       | stress vulnerability           | stress                         | LOCF                      | -0,3236088 | 0,05749486 |
| <b>JF80</b> | CGI-S     | clinical impression (severity) | psychiatric symptoms (general) | Mixed/Hierarchical/Random | -1,2703622 | 0,02218183 |
| <b>JF80</b> | HAM_A     | anxiety (general)              | GAD                            | Mixed/Hierarchical/Random | -1,7116579 | 0,02850852 |
| <b>JF82</b> | MASC      | anxiety (general)(child)       | GAD                            | Unclear                   | -0,5896658 | 0,15216844 |
| <b>JF83</b> | CGI-S     | clinical impression (severity) | psychiatric symptoms (general) | LOCF                      | -1,4940067 | 0,01384142 |
| <b>JF83</b> | HAM_A     | anxiety (general)              | GAD                            | LOCF                      | -1,6261297 | 0,014932   |
| <b>JF87</b> | HAM_A     | anxiety (general)              | GAD                            | LOCF                      | -1,9136148 | 0,0339894  |
| <b>JF88</b> | CAS       | anxiety (general)              | GAD                            | LOCF                      | -1,1122637 | 0,01349405 |
| <b>JF88</b> | CGI-S     | clinical impression (severity) | psychiatric symptoms (general) | LOCF                      | -1,5922933 | 0,01762866 |
| <b>JF88</b> | HADS_A    | anxiety (general)              | GAD                            | LOCF                      | -0,4337978 | 0,01015344 |
| <b>JF88</b> | HAM_A     | anxiety (general)              | GAD                            | LOCF                      | -1,7534182 | 0,01934546 |
| <b>JF89</b> | CGI-S     | clinical impression (severity) | psychiatric symptoms (general) | LOCF                      | -0,8405845 | 0,01323779 |
| <b>JF89</b> | LSAS      | social anxiety                 | social anxiety                 | LOCF                      | -0,5324281 | 0,01172671 |
| <b>JF9</b>  | HADS      | anxiety/depression (general)   | GAD                            | LOCF                      | -0,8731369 | 0,01074962 |
| <b>JF9</b>  | HAM_A     | anxiety (general)              | GAD                            | LOCF                      | -1,0978709 | 0,0120152  |
| <b>JF94</b> | CGI-S     | clinical impression (severity) | psychiatric symptoms (general) | LOCF                      | -1,2451851 | 0,01160838 |
| <b>JF94</b> | LSAS      | social anxiety                 | social anxiety                 | LOCF                      | -1,243839  | 0,01159984 |

|             |           |                                |                                |                           |            |            |
|-------------|-----------|--------------------------------|--------------------------------|---------------------------|------------|------------|
| <b>LM10</b> | FQ        | fear                           | phobia                         | Mixed/Hierarchical/Random | -1,9377466 | 0,17775952 |
| <b>LM10</b> | STAI_STA  | state anxiety (general)        | GAD                            | Mixed/Hierarchical/Random | 0,08991985 | 0,07916015 |
| <b>LM23</b> | CAPS      | PTSD                           | PTSD                           | Completers                | -1,3163237 | 0,39439234 |
| <b>LM24</b> | CAPS      | PTSD                           | PTSD                           | Completers                | -1,1190983 | 0,21261904 |
| <b>LM34</b> | CAPS      | PTSD                           | PTSD                           | Mixed/Hierarchical/Random | -0,7706386 | 0,0216499  |
| <b>LM34</b> | CGI-S     | clinical impression (severity) | psychiatric symptoms (general) | Mixed/Hierarchical/Random | -0,5944926 | 0,02020133 |
| <b>LM34</b> | DESNOS    | stress disorders               | stress                         | Mixed/Hierarchical/Random | -0,6530411 | 0,02064134 |
| <b>LM34</b> | DTS       | PTSD                           | PTSD                           | Mixed/Hierarchical/Random | -0,3838974 | 0,0189601  |
| <b>LM34</b> | HAM_A     | anxiety (general)              | GAD                            | Mixed/Hierarchical/Random | -0,6947136 | 0,02097968 |
| <b>LM34</b> | IES       | PTSD                           | PTSD                           | Mixed/Hierarchical/Random | -0,5144647 | 0,01966671 |
| <b>LM34</b> | MISS      | PTSD                           | PTSD                           | Mixed/Hierarchical/Random | -0,1671264 | 0,01824055 |
| <b>LM37</b> | HAM_A     | anxiety (general)              | GAD                            | Completers                | -1,7097381 | 0,0233197  |
| <b>LM39</b> | CGI-S     | clinical impression (severity) | psychiatric symptoms (general) | LOCF                      | -0,7316824 | 0,05523999 |
| <b>LM39</b> | COIS      | OCD                            | OCD                            | LOCF                      | -0,3056557 | 0,05333492 |
| <b>LM39</b> | CYBOCS    | OCD (child)                    | OCD                            | LOCF                      | -1,1028256 | 0,0658785  |
| <b>LM39</b> | NIMH_GOCS | OCD                            | OCD                            | LOCF                      | -0,7926559 | 0,05669224 |
| <b>LM4</b>  | CAPS      | PTSD                           | PTSD                           | LOCF                      | -2,8773194 | 0,03356835 |
| <b>LM4</b>  | CGI-S     | clinical impression (severity) | psychiatric symptoms (general) | LOCF                      | -2,4214892 | 0,02637979 |
| <b>LM4</b>  | SVS       | stress vulnerability           | stress                         | LOCF                      | -0,9332823 | 0,01152088 |
| <b>LM40</b> | CYBOCS    | OCD (child)                    | OCD                            | LOCF                      | -1,0497786 | 0,0195335  |
| <b>LM42</b> | LSAS      | social anxiety                 | social anxiety                 | Mixed/Hierarchical/Random | -0,1581679 | 0,09453178 |
| <b>LM48</b> | NIMH_GOCS | OCD                            | OCD                            | LOCF                      | -0,2644668 | 0,01967912 |
| <b>LM48</b> | YBOCS     | OCD                            | OCD                            | LOCF                      | -0,3196613 | 0,01988579 |
| <b>LM5</b>  | BSPS      | social anxiety                 | social anxiety                 | Mixed/Hierarchical/Random | -1,2311276 | 0,03763063 |
| <b>LM5</b>  | CGI-S     | clinical impression (severity) | psychiatric symptoms (general) | Mixed/Hierarchical/Random | -9,8722495 | 0,83717759 |
| <b>LM5</b>  | SPAI      | social anxiety                 | social anxiety                 | Mixed/Hierarchical/Random | -0,8085842 | 0,0304484  |
| <b>LM50</b> | CGI-S     | clinical impression (severity) | psychiatric symptoms (general) | Unclear                   | -0,990932  | 0,02370206 |
| <b>LM50</b> | NIMH_GOCS | OCD                            | OCD                            | Unclear                   | -0,9248698 | 0,02294872 |
| <b>LM50</b> | YBOCS     | OCD                            | OCD                            | Unclear                   | -0,9707089 | 0,02346593 |

|             |           |                                |                                |                           |            |            |
|-------------|-----------|--------------------------------|--------------------------------|---------------------------|------------|------------|
| <b>LM54</b> | HADS_A    | anxiety (general)              | GAD                            | LOCF                      | -1,2565712 | 0,01422041 |
| <b>LM54</b> | HAM_A     | anxiety (general)              | GAD                            | LOCF                      | -1,5770419 | 0,01704056 |
| <b>LM57</b> | DTS       | PTSD                           | PTSD                           | Unclear                   | -0,6305615 | 0,28313399 |
| <b>LM57</b> | SIP       | PTSD                           | PTSD                           | Unclear                   | -0,0840749 | 0,25058905 |
| <b>LM59</b> | CAS       | anxiety (general)              | GAD                            | Unclear                   | -0,6359543 | 0,04728386 |
| <b>LM6</b>  | CAPS      | PTSD                           | PTSD                           | Mixed/Hierarchical/Random | -1,6158915 | 0,02597734 |
| <b>LM6</b>  | CAPS_AF   | PTSD                           | PTSD                           | Mixed/Hierarchical/Random | -0,655554  | 0,01587848 |
| <b>LM6</b>  | CGI-S     | clinical impression (severity) | psychiatric symptoms (general) | Mixed/Hierarchical/Random | -1,1033017 | 0,01952442 |
| <b>LM6</b>  | DTS       | PTSD                           | PTSD                           | Mixed/Hierarchical/Random | -0,7579935 | 0,01654886 |
| <b>LM6</b>  | HAM_A     | anxiety (general)              | GAD                            | Mixed/Hierarchical/Random | -0,8587862 | 0,0173033  |
| <b>LM6</b>  | IES       | PTSD                           | PTSD                           | Mixed/Hierarchical/Random | -0,9655792 | 0,01820529 |
| <b>LM60</b> | CGI-S     | clinical impression (severity) | psychiatric symptoms (general) | LOCF                      | -0,4427565 | 0,01268267 |
| <b>LM60</b> | YBOCS     | OCD                            | OCD                            | LOCF                      | -1,5644064 | 0,02161654 |
| <b>LM67</b> | CGI       | clinical impression (general)  | psychiatric symptoms (general) | Unclear                   | -0,2399776 | 0,07643973 |
| <b>LM67</b> | NIMH_GOCS | OCD                            | OCD                            | Unclear                   | -0,4517225 | 0,08010133 |
| <b>LM67</b> | YBOCS     | OCD                            | OCD                            | Unclear                   | -0,1416261 | 0,07550145 |
| <b>LM69</b> | CPRS_OCD  | OCD                            | OCD                            | LOCF                      | -0,6527481 | 0,08157333 |
| <b>LM69</b> | NIMH_GOCS | OCD                            | OCD                            | LOCF                      | -0,3847778 | 0,07495367 |
| <b>LM69</b> | YBOCS     | OCD                            | OCD                            | LOCF                      | -0,0310305 | 0,0714515  |
| <b>LM71</b> | YBOCS     | OCD                            | OCD                            | LOCF                      | -1,0087221 | 0,02136979 |
| <b>LM72</b> | CGI-S     | clinical impression (severity) | psychiatric symptoms (general) | LOCF                      | -1,3179775 | 0,01850416 |
| <b>LM72</b> | GA_VAS    | anxiety (general)              | GAD                            | LOCF                      | -0,624819  | 0,01324375 |
| <b>LM72</b> | HADS_A    | anxiety (general)              | GAD                            | LOCF                      | -1,0836704 | 0,01630602 |
| <b>LM72</b> | HAM_A     | anxiety (general)              | GAD                            | LOCF                      | -2,5700561 | 0,03752027 |
| <b>LM73</b> | LSAS      | social anxiety                 | social anxiety                 | LOCF                      | -1,615028  | 0,0158427  |
| <b>LM74</b> | CAS       | anxiety (general)              | GAD                            | LOCF                      | -2,486081  | 0,0337522  |
| <b>LM74</b> | CGI-S     | clinical impression (severity) | psychiatric symptoms (general) | LOCF                      | -1,6573874 | 0,02112843 |
| <b>LM74</b> | HAM_A     | anxiety (general)              | GAD                            | LOCF                      | -2,010023  | 0,02588306 |
| <b>LM76</b> | BSPS      | social anxiety                 | social anxiety                 | LOCF                      | -0,6746749 | 0,28793218 |

|             |           |                                |                                |                           |            |            |
|-------------|-----------|--------------------------------|--------------------------------|---------------------------|------------|------------|
| <b>LM76</b> | FQ        | fear                           | phobia                         | LOCF                      | -0,2407598 | 0,25483044 |
| <b>LM76</b> | LSAS      | social anxiety                 | social anxiety                 | LOCF                      | -0,3093321 | 0,25797386 |
| <b>LM86</b> | ACQ       | panic                          | panic                          | Mixed/Hierarchical/Random | -0,7628388 | 0,02888648 |
| <b>LM86</b> | BSQ       | somatic anxiety                | somatic                        | Mixed/Hierarchical/Random | -1,2771864 | 0,03734843 |
| <b>LM86</b> | CGI-S     | clinical impression (severity) | psychiatric symptoms (general) | Mixed/Hierarchical/Random | -1,7558148 | 0,04905553 |
| <b>LM86</b> | MI-AAL    | avoidance (panic)              | panic                          | Mixed/Hierarchical/Random | -0,5706398 | 0,0268196  |
| <b>LM95</b> | CGI-S     | clinical impression (severity) | psychiatric symptoms (general) | LOCF                      | -0,9783912 | 0,0549618  |
| <b>LM95</b> | IES_R     | PTSD                           | PTSD                           | LOCF                      | -4,7861842 | 0,35982721 |
| <b>MC10</b> | CGI-S     | clinical impression (severity) | psychiatric symptoms (general) | LOCF                      | -0,8714082 | 0,01021563 |
| <b>MC10</b> | LSAS      | social anxiety                 | social anxiety                 | LOCF                      | -0,7703291 | 0,00976469 |
| <b>MC10</b> | SADS      | social anxiety                 | social anxiety                 | LOCF                      | -0,7704094 | 0,00976503 |
| <b>MC12</b> | CGI-S     | clinical impression (severity) | psychiatric symptoms (general) | LOCF                      | -1,5499721 | 0,01607861 |
| <b>MC12</b> | FQ_F      | fear (phobia)                  | phobia                         | LOCF                      | -0,595949  | 0,00998558 |
| <b>MC12</b> | FQ_AV     | avoidance (phobia)             | phobia                         | LOCF                      | -0,456146  | 0,00954783 |
| <b>MC12</b> | HAM_A     | anxiety (general)              | GAD                            | LOCF                      | -1,396932  | 0,01473637 |
| <b>MC12</b> | PDSS      | panic                          | panic                          | LOCF                      | -2,0455503 | 0,02138177 |
| <b>MC13</b> | CGI-S     | clinical impression (severity) | psychiatric symptoms (general) | LOCF                      | -1,0442068 | 0,02152825 |
| <b>MC13</b> | LSAS      | social anxiety                 | social anxiety                 | LOCF                      | -0,6441535 | 0,01797334 |
| <b>MC13</b> | SADS      | social anxiety                 | social anxiety                 | LOCF                      | -0,7112427 | 0,01845193 |
| <b>MC14</b> | CGI-S     | clinical impression (severity) | psychiatric symptoms (general) | LOCF                      | -0,6999775 | 0,01264481 |
| <b>MC14</b> | LSAS      | social anxiety                 | social anxiety                 | LOCF                      | -0,8438757 | 0,01344973 |
| <b>MC15</b> | BSPS      | social anxiety                 | social anxiety                 | LOCF                      | -1,2395827 | 0,01111903 |
| <b>MC15</b> | CGI-S     | clinical impression (severity) | psychiatric symptoms (general) | LOCF                      | -1,1386287 | 0,01053058 |
| <b>MC15</b> | HAM_A     | anxiety (general)              | GAD                            | LOCF                      | -0,2061311 | 0,00745708 |
| <b>MC15</b> | LSAS      | social anxiety                 | social anxiety                 | LOCF                      | -1,351232  | 0,01182801 |
| <b>MC16</b> | CGI-S     | clinical impression (severity) | psychiatric symptoms (general) | LOCF                      | -0,8308468 | 0,0838706  |
| <b>MC16</b> | CYBOCS    | OCD (child)                    | OCD                            | LOCF                      | -0,8802656 | 0,08579244 |
| <b>MC16</b> | NIMH_GOCS | OCD                            | OCD                            | LOCF                      | -0,9853595 | 0,09024848 |
| <b>MC17</b> | LSAS      | social anxiety                 | social anxiety                 | LOCF                      | -1,1442139 | 0,01496259 |

|              |               |                                |                                |      |            |            |
|--------------|---------------|--------------------------------|--------------------------------|------|------------|------------|
| <b>MC17</b>  | SPIN          | social anxiety                 | social anxiety                 | LOCF | -0,7054926 | 0,01214486 |
| <b>MC2</b>   | FQ            | phobia                         | phobia                         | LOCF | -1,1539582 | 0,02256052 |
| <b>MC20a</b> | PAAS_AA_T_P   | anticipatory anxiety           | GAD                            | LOCF | -0,1513503 | 0,03435121 |
| <b>MC20a</b> | PAAS_PA_WK_N  | panic attack                   | panic                          | LOCF | -0,0377861 | 0,03410713 |
| <b>MC20a</b> | PAAS_PAL_WK_N | panic attack (limited)         | panic                          | LOCF | 0,01183661 | 0,0340925  |
| <b>MC20a</b> | PAAS_UA_WK_DN | unexpected panic attack        | panic                          | LOCF | -0,112924  | 0,03423582 |
| <b>MC20b</b> | PAAS_PA_WK_N  | panic attack                   | panic                          | LOCF | -0,0377861 | 0,03410713 |
| <b>MC20b</b> | PAAS_PAL_WK_N | panic attack (limited)         | panic                          | LOCF | 0,01183661 | 0,0340925  |
| <b>MC20b</b> | PAAS_UA_WK_DN | unexpected panic attack        | panic                          | LOCF | -0,112924  | 0,03423582 |
| <b>MC22</b>  | HADS_A        | anxiety (general)              | GAD                            | LOCF | -1,2439791 | 0,01448243 |
| <b>MC22</b>  | HAM_A         | anxiety (general)              | GAD                            | LOCF | -3,0312745 | 0,03881728 |
| <b>MC25</b>  | SAS_CA        | social anxiety (child)         | social anxiety                 | LOCF | -1,6143463 | 0,01893957 |
| <b>MC26</b>  | CYBOCS        | OCD (child)                    | OCD                            | LOCF | -1,089727  | 0,07477687 |
| <b>MC28</b>  | CGI-S         | clinical impression (severity) | psychiatric symptoms (general) | LOCF | -0,7405211 | 0,01867564 |
| <b>MC28</b>  | CYBOCS        | OCD (child)                    | OCD                            | LOCF | -0,7031524 | 0,0183917  |
| <b>MC28</b>  | NIMH_GOCS     | OCD                            | OCD                            | LOCF | -0,8610567 | 0,01969168 |
| <b>MC3</b>   | HAM_A         | anxiety (general)              | GAD                            | LOCF | -1,5494735 | 0,02213471 |
| <b>MC31</b>  | CAPS          | PTSD                           | PTSD                           | LOCF | -1,584734  | 0,01481554 |
| <b>MC32</b>  | CAPS          | PTSD                           | PTSD                           | LOCF | -0,7571516 | 0,06617183 |
| <b>MC32</b>  | CAPS_AF       | PTSD                           | PTSD                           | LOCF | -0,4762544 | 0,05975589 |
| <b>MC32</b>  | HAM_A         | anxiety (general)              | GAD                            | LOCF | -0,6918532 | 0,06441965 |
| <b>MC33</b>  | CAPS          | PTSD                           | PTSD                           | LOCF | -2,1661744 | 0,04370632 |
| <b>MC33</b>  | CGI-S         | clinical impression (severity) | psychiatric symptoms (general) | LOCF | -2,5587555 | 0,05424562 |
| <b>MC33</b>  | DTS           | PTSD                           | PTSD                           | LOCF | -1,3858895 | 0,02795846 |
| <b>MC33</b>  | HAM_A         | anxiety (general)              | GAD                            | LOCF | -1,2424276 | 0,02581606 |
| <b>MC33</b>  | TOP8          | PTSD                           | PTSD                           | LOCF | -2,5668459 | 0,05448124 |
| <b>MC34</b>  | CAPS          | PTSD                           | PTSD                           | LOCF | -1,1717548 | 0,06430896 |
| <b>MC34</b>  | CGI-S         | clinical impression (severity) | psychiatric symptoms (general) | LOCF | -1,0422079 | 0,06009114 |
| <b>MC34</b>  | DTS           | PTSD                           | PTSD                           | LOCF | -0,3292769 | 0,04571211 |

|             |               |                                |                                |         |            |            |
|-------------|---------------|--------------------------------|--------------------------------|---------|------------|------------|
| <b>MC34</b> | HAM_A         | anxiety (general)              | GAD                            | LOCF    | -0,5084752 | 0,04791981 |
| <b>MC34</b> | TOP8          | PTSD                           | PTSD                           | LOCF    | -1,4943422 | 0,07695675 |
| <b>MC38</b> | CGI-S         | clinical impression (severity) | psychiatric symptoms (general) | LOCF    | -2,1423472 | 0,01790012 |
| <b>MC38</b> | HAM_A         | anxiety (general)              | GAD                            | LOCF    | -2,4841495 | 0,02162971 |
| <b>MC39</b> | HAM_A         | anxiety (general)              | GAD                            | LOCF    | -0,6560225 | 0,02198952 |
| <b>MC39</b> | PAAS_PA_WK_N  | panic attack                   | panic                          | LOCF    | -0,3257311 | 0,0199109  |
| <b>MC4</b>  | HAM_A         | anxiety (general)              | GAD                            | LOCF    | -1,7792111 | 0,18134095 |
| <b>MC40</b> | HAM_A         | anxiety (general)              | GAD                            | LOCF    | -1,4799184 | 0,02883421 |
| <b>MC40</b> | PAAS_PAF_WK_N | panic attack (full)            | panic                          | LOCF    | -0,7271332 | 0,01960402 |
| <b>MC40</b> | PDSS          | panic                          | panic                          | LOCF    | -2,2835589 | 0,0456369  |
| <b>MC40</b> | STAI_STA      | state anxiety (general)        | GAD                            | LOCF    | -0,6046008 | 0,01869746 |
| <b>MC42</b> | CAS           | anxiety (general)              | GAD                            | LOCF    | -0,1292711 | 0,02693492 |
| <b>MC42</b> | CGI-S         | clinical impression (severity) | psychiatric symptoms (general) | LOCF    | -0,6575273 | 0,03064591 |
| <b>MC42</b> | CPRS_OCD      | OCD (child)                    | OCD                            | LOCF    | -0,6211136 | 0,0302302  |
| <b>MC42</b> | YBOCS         | OCD                            | OCD                            | LOCF    | -0,4543264 | 0,02862868 |
| <b>MC44</b> | HADS_A        | anxiety (general)              | GAD                            | LOCF    | -1,2179815 | 0,02219544 |
| <b>MC44</b> | HAM_A         | anxiety (general)              | GAD                            | LOCF    | -2,0932264 | 0,03654256 |
| <b>MC45</b> | NIMH_GOCS     | OCD                            | OCD                            | LOCF    | -0,9924781 | 0,01972779 |
| <b>MC45</b> | YBOCS         | OCD                            | OCD                            | LOCF    | -1,4250967 | 0,02490545 |
| <b>MC51</b> | CAS           | anxiety (general)              | GAD                            | LOCF    | -0,9079307 | 0,04068445 |
| <b>MC51</b> | CGI_E         | clinical impression (efficacy) | psychiatric symptoms (general) | LOCF    | -1,6813599 | 0,06198905 |
| <b>MC51</b> | CGI-S         | clinical impression (severity) | psychiatric symptoms (general) | LOCF    | -1,2646177 | 0,04892828 |
| <b>MC51</b> | PAAS_AA       | anticipatory anxiety           | GAD                            | LOCF    | -0,4276485 | 0,03386046 |
| <b>MC51</b> | PAAS_AA_T_P   | anticipatory anxiety           | GAD                            | LOCF    | -0,324261  | 0,03303346 |
| <b>MC51</b> | PAAS_PAF_WK_N | panic attack (full)            | panic                          | LOCF    | -0,2831551 | 0,03276784 |
| <b>MC51</b> | PAAS_PAL_WK_N | panic attack (limited)         | panic                          | LOCF    | -0,4968141 | 0,03454068 |
| <b>MC55</b> | HAM_A         | anxiety (general)              | GAD                            | LOCF    | -1,5683392 | 0,01605791 |
| <b>MC56</b> | HAM_A         | anxiety (general)              | GAD                            | Unclear | -1,6263826 | 0,12829819 |
| <b>MC6</b>  | HAM_A         | anxiety (general)              | GAD                            | LOCF    | -0,7772645 | 0,0193771  |



|             |               |                                |                                |         |            |            |
|-------------|---------------|--------------------------------|--------------------------------|---------|------------|------------|
| <b>MC6</b>  | PSWQ          | worry (GAD)                    | GAD                            | LOCF    | -0,3179887 | 0,01667267 |
| <b>MC62</b> | CGI-S         | clinical impression (severity) | psychiatric symptoms (general) | LOCF    | -0,5587144 | 0,0473166  |
| <b>MC62</b> | IES_R         | PTSD                           | PTSD                           | LOCF    | -3,4221256 | 0,21015634 |
| <b>MC73</b> | PAAS_PAF_WK_N | panic attack (full)            | panic                          | LOCF    | -0,4830987 | 0,0102974  |
| <b>MC73</b> | PDSS          | panic                          | panic                          | LOCF    | -2,4811419 | 0,02915944 |
| <b>MC77</b> | HADS_A        | anxiety (general)              | GAD                            | LOCF    | -0,8056153 | 0,0111933  |
| <b>MC77</b> | HAM_A         | anxiety (general)              | GAD                            | LOCF    | -1,8191313 | 0,01935349 |
| <b>MC79</b> | CGI-S         | clinical impression (severity) | psychiatric symptoms (general) | LOCF    | -2,0033984 | 0,0224795  |
| <b>MC79</b> | FQ_F          | fear (phobia)                  | phobia                         | LOCF    | -0,6509821 | 0,01097365 |
| <b>MC79</b> | FQ_AV         | avoidance (phobia)             | phobia                         | LOCF    | -0,5431747 | 0,01056102 |
| <b>MC81</b> | HAM_A         | anxiety (general)              | GAD                            | LOCF    | 0,0053446  | 0,12500119 |
| <b>MC81</b> | MSPRS_F       | fear                           | phobia                         | LOCF    | -0,5259239 | 0,13652483 |
| <b>MC81</b> | MSPRS_AV      | avoidance (phobia)             | phobia                         | LOCF    | -0,3515702 | 0,13015007 |
| <b>MC81</b> | PAAS_PA_WK_N  | panic attack                   | panic                          | LOCF    | 0,60583701 | 0,14029327 |
| <b>MC81</b> | SCL61         | psychiatric symptoms (general) | psychiatric symptoms (general) | LOCF    | -0,1450424 | 0,12587655 |
| <b>MC82</b> | CGI-S         | clinical impression (severity) | psychiatric symptoms (general) | LOCF    | -1,2887554 | 0,02648233 |
| <b>MC82</b> | HAM_A         | anxiety (general)              | GAD                            | LOCF    | -2,0620086 | 0,04120386 |
| <b>MC82</b> | PAAS_AA_T_P   | anticipatory anxiety           | GAD                            | LOCF    | -0,0069399 | 0,01704573 |
| <b>MC82</b> | PAAS_PAF_EB   | panic attack (full)            | panic                          | LOCF    | -0,1992728 | 0,01727108 |
| <b>MC82</b> | PDSS          | panic                          | panic                          | LOCF    | -0,158616  | 0,0171884  |
| <b>MJ1</b>  | LSAS          | social anxiety                 | social anxiety                 | LOCF    | -0,9694289 | 0,01459182 |
| <b>MJ14</b> | HADS_A        | anxiety (general)              | GAD                            | LOCF    | -0,5914595 | 0,01053404 |
| <b>MJ14</b> | HADS_D        | anxiety (general)              | GAD                            | LOCF    | -0,3744015 | 0,00987477 |
| <b>MJ14</b> | HAM_A         | anxiety (general)              | GAD                            | LOCF    | -0,742024  | 0,01116541 |
| <b>MJ16</b> | ADIS_C        | anxiety (general)(child)       | GAD                            | Unclear | -1,5938333 | 0,25183203 |
| <b>MJ16</b> | ADIS_P        | anxiety (general)(child)       | GAD                            | Unclear | -1,7429639 | 0,27445106 |
| <b>MJ16</b> | HAM_A         | anxiety (general)              | GAD                            | Unclear | -0,5305787 | 0,14915972 |
| <b>MJ16</b> | MASC          | anxiety (general)(child)       | GAD                            | Unclear | -0,9387934 | 0,17642423 |
| <b>MJ16</b> | RCMAS         | anxiety (general)(child)       | GAD                            | Unclear | -0,4018408 | 0,14370346 |

|             |              |                                |                                |            |            |            |
|-------------|--------------|--------------------------------|--------------------------------|------------|------------|------------|
| <b>MJ17</b> | PAAS_PA_WK_N | panic attack                   | panic                          | Completers | -0,4131522 | 0,06892815 |
| <b>MJ2</b>  | HAM_A        | anxiety (general)              | GAD                            | LOCF       | -2,1495087 | 0,03968952 |
| <b>MJ22</b> | HAM_A        | anxiety (general)              | GAD                            | LOCF       | -1,3468351 | 0,06505358 |
| <b>MJ25</b> | CGI-S        | clinical impression (severity) | psychiatric symptoms (general) | LOCF       | -1,3487459 | 0,00541474 |
| <b>MJ25</b> | HAM_A        | anxiety (general)              | GAD                            | LOCF       | -0,8008748 | 0,00409146 |
| <b>MJ25</b> | MSPRS_F      | fear                           | phobia                         | LOCF       | -0,4897049 | 0,00364024 |
| <b>MJ25</b> | MSPRS_AV     | avoidance (phobia)             | phobia                         | LOCF       | -0,392692  | 0,00354405 |
| <b>MJ25</b> | PAAS_PA_WK_N | panic attack                   | panic                          | LOCF       | -0,3499012 | 0,00350835 |
| <b>MJ3</b>  | CGI-S        | clinical impression (severity) | psychiatric symptoms (general) | LOCF       | -1,8256392 | 0,01759155 |
| <b>MJ3</b>  | HADS_A       | anxiety (general)              | GAD                            | LOCF       | -0,968142  | 0,01093694 |
| <b>MJ3</b>  | HAM_A        | anxiety (general)              | GAD                            | LOCF       | -2,5029648 | 0,02573565 |
| <b>MJ36</b> | CGI-S        | clinical impression (severity) | psychiatric symptoms (general) | LOCF       | -1,9872566 | 0,02919827 |
| <b>MJ36</b> | HAM_A        | anxiety (general)              | GAD                            | LOCF       | -0,6624189 | 0,01444873 |
| <b>MJ36</b> | PAAS         | panic                          | panic                          | LOCF       | -0,4613274 | 0,01349926 |
| <b>MJ36</b> | PAAS_PA_WK_N | panic attack                   | panic                          | LOCF       | -0,2384708 | 0,01284398 |
| <b>MJ4</b>  | CGI_OCD      | OCD                            | OCD                            | LOCF       | -0,8686267 | 0,26817945 |
| <b>MJ4</b>  | LOICV        | obsession (child)              | OCD                            | LOCF       | -0,2921744 | 0,22038328 |
| <b>MJ4</b>  | RCMAS        | anxiety (general)(child)       | GAD                            | LOCF       | -0,4114547 | 0,22637821 |
| <b>MJ4</b>  | YBOCS        | OCD                            | OCD                            | LOCF       | -0,6091668 | 0,24079173 |
| <b>MJ42</b> | LSAS         | social anxiety                 | social anxiety                 | LOCF       | -0,92593   | 0,01439308 |
| <b>MJ42</b> | SPIN         | social anxiety                 | social anxiety                 | LOCF       | -0,5007003 | 0,01212948 |
| <b>MJ44</b> | NIMH_GOCS    | OCD                            | OCD                            | LOCF       | -0,9411197 | 0,01689438 |
| <b>MJ44</b> | YBOCS        | OCD                            | OCD                            | LOCF       | -2,0009998 | 0,03045218 |
| <b>MJ5</b>  | CGI          | clinical impression (general)  | psychiatric symptoms (general) | LOCF       | -0,329282  | 0,02467005 |
| <b>MJ5</b>  | CYBOCS       | OCD (child)                    | OCD                            | LOCF       | -0,6791441 | 0,02747013 |
| <b>MJ5</b>  | NIMH_GOCS    | OCD                            | OCD                            | LOCF       | -0,7761647 | 0,02859073 |
| <b>MJ5</b>  | PAGI         | parent impression (general)    | psychiatric symptoms (general) | LOCF       | -0,329282  | 0,02467005 |
| <b>MJ5</b>  | PGI          | patient impression (general)   | psychiatric symptoms (general) | LOCF       | -0,493923  | 0,02574571 |
| <b>MJ53</b> | BSPS         | social anxiety                 | social anxiety                 | LOCF       | -0,9082818 | 0,04346563 |

|             |           |                                |                                |            |            |            |
|-------------|-----------|--------------------------------|--------------------------------|------------|------------|------------|
| <b>MJ53</b> | LSAS      | social anxiety                 | social anxiety                 | LOCF       | -0,2438365 | 0,03476655 |
| <b>MJ53</b> | SPIN      | social anxiety                 | social anxiety                 | LOCF       | -0,4180591 | 0,03607697 |
| <b>MJ54</b> | LSAS      | social anxiety                 | social anxiety                 | LOCF       | -0,6528558 | 0,01842054 |
| <b>MJ56</b> | CGI-S     | clinical impression (severity) | psychiatric symptoms (general) | LOCF       | -2,320438  | 0,03060012 |
| <b>MJ56</b> | PARS      | anxiety (general)(child)       | GAD                            | LOCF       | -2,6519292 | 0,0366158  |
| <b>MJ6</b>  | CGI-S     | clinical impression (severity) | psychiatric symptoms (general) | LOCF       | -2,9629375 | 0,09499192 |
| <b>MJ6</b>  | CSDC      | PTSD                           | PTSD                           | LOCF       | -1,6429108 | 0,04596094 |
| <b>MJ6</b>  | UCLA_PTSD | PTSD                           | PTSD                           | LOCF       | -2,2222031 | 0,06401763 |
| <b>MJ64</b> | CAPS      | PTSD                           | PTSD                           | LOCF       | -2,9645397 | 0,58942477 |
| <b>MJ64</b> | IES_R     | PTSD                           | PTSD                           | LOCF       | -3,0247074 | 0,60744275 |
| <b>MJ66</b> | CAPS      | PTSD                           | PTSD                           | LOCF       | -1,5138429 | 0,01696064 |
| <b>MJ66</b> | DTS       | PTSD                           | PTSD                           | LOCF       | -1,0313608 | 0,0130247  |
| <b>MJ66</b> | TOP8      | PTSD                           | PTSD                           | LOCF       | -0,1091214 | 0,00965355 |
| <b>MJ70</b> | BSPS      | social anxiety                 | social anxiety                 | LOCF       | -0,9349618 | 0,02807358 |
| <b>MJ70</b> | CGI-S     | clinical impression (severity) | psychiatric symptoms (general) | LOCF       | -1,2122283 | 0,03238766 |
| <b>MJ70</b> | FNE       | fear of negative evaluation    | social anxiety                 | LOCF       | -0,4895098 | 0,02347551 |
| <b>MJ70</b> | FQ_SA     | social anxiety                 | social anxiety                 | LOCF       | -0,3174321 | 0,0224693  |
| <b>MJ70</b> | SADS      | social anxiety                 | social anxiety                 | LOCF       | -1,0838597 | 0,03025182 |
| <b>MJ70</b> | SPAI_SA   | social anxiety                 | social anxiety                 | LOCF       | -0,8772037 | 0,02731512 |
| <b>MJ71</b> | CAPS      | PTSD                           | PTSD                           | Unclear    | -2,0019949 | 0,12082731 |
| <b>MJ73</b> | HAM_A     | anxiety (general)              | GAD                            | Completers | -0,8259477 | 0,14162268 |
| <b>MJ73</b> | LSAS_AV   | avoidance (social anxiety)     | social anxiety                 | Completers | -0,6658883 | 0,13243874 |
| <b>MJ73</b> | SCL90     | psychiatric symptoms (general) | psychiatric symptoms (general) | Completers | -0,7787507 | 0,13870972 |
| <b>MJ73</b> | SPAI      | social anxiety                 | social anxiety                 | Completers | -0,5191671 | 0,12575133 |
| <b>MJ77</b> | HAM_A     | anxiety (general)              | GAD                            | LOCF       | -1,3466381 | 0,02506997 |
| <b>MJ78</b> | K_GSADS_A | social anxiety                 | social anxiety                 | LOCF       | -0,7991796 | 0,01158818 |
| <b>MJ78</b> | LSAS_C    | social anxiety (child)         | social anxiety                 | LOCF       | -0,8921699 | 0,01208907 |
| <b>MJ78</b> | SPAI      | social anxiety                 | social anxiety                 | LOCF       | -0,5882172 | 0,01065605 |
| <b>MJ78</b> | SPIN_C    | social anxiety (child)         | social anxiety                 | LOCF       | -0,7297411 | 0,01125007 |

|              |           |                                |                                |            |            |            |
|--------------|-----------|--------------------------------|--------------------------------|------------|------------|------------|
| <b>MJ79</b>  | CGI-S     | clinical impression (severity) | psychiatric symptoms (general) | LOCF       | -1,8384989 | 0,0419742  |
| <b>MJ79</b>  | PARS      | anxiety (general)(child)       | GAD                            | LOCF       | -1,776853  | 0,04050794 |
| <b>MJ80</b>  | PARS      | anxiety (general)(child)       | GAD                            | LOCF       | -1,0870503 | 0,03216676 |
| <b>MJ84</b>  | CGI-S     | clinical impression (severity) | psychiatric symptoms (general) | LOCF       | -1,06108   | 0,01366189 |
| <b>MJ84</b>  | LSAS      | social anxiety                 | social anxiety                 | LOCF       | -1,3219177 | 0,01572009 |
| <b>MJ85</b>  | FQ        | fear                           | phobia                         | Unclear    | -0,3577375 | 0,0781994  |
| <b>MJ85</b>  | HAM_A     | anxiety (general)              | GAD                            | Unclear    | -0,3219637 | 0,07759152 |
| <b>MJ85</b>  | SCL90     | psychiatric symptoms (general) | psychiatric symptoms (general) | Unclear    | 0          | 0,075      |
| <b>MJ85</b>  | STAI_STA  | state anxiety (general)        | GAD                            | Unclear    | 0,08943437 | 0,07519996 |
| <b>MJ89</b>  | HADS_A    | anxiety (general)              | GAD                            | LOCF       | -1,6211695 | 0,02758917 |
| <b>MJ89</b>  | HAM_A     | anxiety (general)              | GAD                            | LOCF       | -2,2867637 | 0,04033965 |
| <b>MJ93</b>  | CAPS      | PTSD                           | PTSD                           | LOCF       | -1,1049766 | 0,11107825 |
| <b>MJ93</b>  | CGI-S     | clinical impression (severity) | psychiatric symptoms (general) | LOCF       | -0,6019492 | 0,08848271 |
| <b>MJ94</b>  | YBOCS     | OCD                            | OCD                            | LOCF       | -0,9366658 | 0,01958254 |
| <b>MJ96</b>  | CGI-S     | clinical impression (severity) | psychiatric symptoms (general) | LOCF       | -2,3198415 | 0,03199109 |
| <b>MJ96</b>  | HADS_A    | anxiety (general)              | GAD                            | LOCF       | -1,8641584 | 0,02471407 |
| <b>MJ96</b>  | HAM_A     | anxiety (general)              | GAD                            | LOCF       | -3,0996202 | 0,04812078 |
| <b>MJ97</b>  | MOCI      | OCD                            | OCD                            | Completers | -0,0975895 | 0,16719576 |
| <b>MJ97</b>  | NIMH_GOCS | OCD                            | OCD                            | Completers | 0,13887744 | 0,16773816 |
| <b>MJ97</b>  | YBOCS     | OCD                            | OCD                            | Completers | -0,0940316 | 0,16715789 |
| <b>UNG1</b>  | CGI-S     | clinical impression (severity) | psychiatric symptoms (general) | LOCF       | -1,581573  | 0,02148974 |
| <b>UNG1</b>  | HAM_A     | anxiety (general)              | GAD                            | LOCF       | -2,255206  | 0,03158576 |
| <b>UNG10</b> | CGI-S     | clinical impression (severity) | psychiatric symptoms (general) | LOCF       | -0,6173683 | 0,14088098 |
| <b>UNG10</b> | LSAS      | social anxiety                 | social anxiety                 | LOCF       | -0,562409  | 0,13817933 |
| <b>UNG11</b> | CGI-S     | clinical impression (severity) | psychiatric symptoms (general) | LOCF       | -0,4072368 | 0,01778563 |
| <b>UNG11</b> | NIMH_GOCS | OCD                            | OCD                            | LOCF       | -0,3894637 | 0,01770608 |
| <b>UNG11</b> | SCL90     | psychiatric symptoms (general) | psychiatric symptoms (general) | LOCF       | -0,0512377 | 0,01686868 |
| <b>UNG11</b> | YBOCS     | OCD                            | OCD                            | LOCF       | -0,642025  | 0,01916964 |
| <b>UNG12</b> | CGI_E     | clinical impression (efficacy) | psychiatric symptoms (general) | LOCF       | 0,45132653 | 0,02080322 |

|              |           |                                |                                |      |            |            |
|--------------|-----------|--------------------------------|--------------------------------|------|------------|------------|
| <b>UNG12</b> | CGI-S     | clinical impression (severity) | psychiatric symptoms (general) | LOCF | -0,620574  | 0,02198125 |
| <b>UNG12</b> | NIMH_GOCS | OCD                            | OCD                            | LOCF | -0,8381778 | 0,02404248 |
| <b>UNG12</b> | SCL90     | psychiatric symptoms (general) | psychiatric symptoms (general) | LOCF | -0,1865592 | 0,01970652 |
| <b>UNG12</b> | YBOCS     | OCD                            | OCD                            | LOCF | -0,9457342 | 0,0252884  |
| <b>UNG17</b> | LSAS      | social anxiety                 | social anxiety                 | LOCF | -0,5709883 | 0,0268228  |
| <b>UNG2</b>  | CGI-S     | clinical impression (severity) | psychiatric symptoms (general) | LOCF | -1,9048195 | 0,02401571 |
| <b>UNG2</b>  | HAM_A     | anxiety (general)              | GAD                            | LOCF | -2,1446856 | 0,02753506 |
| <b>UNG3</b>  | CYBOCS    | OCD (child)                    | OCD                            | LOCF | -1,1984289 | 0,12322866 |
| <b>UNG6</b>  | CAS       | anxiety (general)              | GAD                            | LOCF | -0,9570212 | 0,01069915 |
| <b>UNG6</b>  | CGI-S     | clinical impression (severity) | psychiatric symptoms (general) | LOCF | -0,8834042 | 0,01032897 |
| <b>UNG6</b>  | HADS      | anxiety/depression (general)   | GAD                            | LOCF | -0,6748226 | 0,00944094 |
| <b>UNG6</b>  | HAM_A     | anxiety (general)              | GAD                            | LOCF | -2,0796806 | 0,02001386 |
| <b>UNG7</b>  | CAS       | anxiety (general)              | GAD                            | LOCF | -1,6344297 | 0,01739681 |
| <b>UNG7</b>  | CGI-S     | clinical impression (severity) | psychiatric symptoms (general) | LOCF | -2,0404921 | 0,02197426 |
| <b>UNG7</b>  | HADS      | anxiety/depression (general)   | GAD                            | LOCF | -0,8517688 | 0,01142795 |
| <b>UNG7</b>  | HAM_A     | anxiety (general)              | GAD                            | LOCF | -2,9286613 | 0,03551245 |
| <b>UNG8</b>  | CAPS      | PTSD                           | PTSD                           | LOCF | -2,9322805 | 0,52719404 |
| <b>UNG8</b>  | DTS       | PTSD                           | PTSD                           | LOCF | -3,3010126 | 0,63166745 |
| <b>UNG8</b>  | TOP8      | PTSD                           | PTSD                           | LOCF | -2,0659249 | 0,33036571 |
| <b>UNG9</b>  | LSAS      | social anxiety                 | social anxiety                 | LOCF | -1,4560028 | 0,03605594 |
| <b>UPD3</b>  | HAM_A     | anxiety (general)              | GAD                            | LOCF | -0,50085   | 0,05418085 |
| <b>UPD3</b>  | LSAS      | social anxiety                 | social anxiety                 | LOCF | -1,6637031 | 0,0961318  |
| <b>UPD8</b>  | PARS      | anxiety (general)(child)       | GAD                            | LOCF | -1,7043228 | 0,11809432 |

**Table G:** Multiple multilevel meta-regression model for placebo response on the aggregate measure of internalizing in adults

|                                               | <b>o/k (n)</b> | <b>SMD</b> | <b>95% CI</b> | <b>p-value</b> |
|-----------------------------------------------|----------------|------------|---------------|----------------|
| <b>Main disorder</b>                          |                |            |               |                |
| GAD [index]                                   | 18/8 (1224)    | -          | -             | -              |
| PTSD                                          | 8/3 (113)      | 0.26       | 0.23 to 1.40  | 0.64           |
| Panic                                         | 29/7 (936)     | 1.00       | 0.23 to 1.77  | 0.01 *         |
| SAD                                           | 29/11 (748)    | 0.32       | 0.23 to 1.15  | 0.45           |
| OCD                                           | 11/5 (469)     | 1.20       | 0.44 to 1.96  | 0.001 *        |
| <b>Sampling</b>                               |                |            |               |                |
| Outpatients [index]                           | 71/27 (2394)   | -          | -             | -              |
| Mixed                                         | 4/1 (128)      | 0.74       | -0.49 to 1.97 | 0.24           |
| Unclear                                       | 20/6 (968)     | -0.23      | -0.81 to 0.33 | 0.41           |
| <b>Concomitant benzodiazepine use</b>         |                |            |               |                |
| No [index]                                    | 38/14 (2117)   | -          | -             | -              |
| Not informed                                  | 20/8 (610)     | 0.36       | -0.46 to 1.18 | 0.38           |
| Unclear                                       | 3/2 (173)      | 2.27       | 0.96 to 3.57  | 0.001 *        |
| Yes                                           | 34/10 (590)    | 0.31       | -0.36 to 0.99 | 0.36           |
| <b>Placebo lead-in period</b>                 |                |            |               |                |
| No [index]                                    | 41/17 (1241)   | -          | -             | -              |
| Not informed                                  | 11/6 (675)     | 0.11       | -0.61 to 0.85 | 0.75           |
| Yes                                           | 43/11 (1574)   | -0.18      | -0.83 to 0.45 | 0.56           |
| <b>Time to outcome measure</b>                |                |            |               |                |
| 12-14 week [index]                            | 39/16 (1644)   | -          | -             | -              |
| 6-8 week                                      | 29/10 (845)    | -0.58      | -1.27 to 0.10 | 0.09           |
| 9-11 week                                     | 21/7 (932)     | -0.06      | -0.58 to 0.45 | 0.09           |
| 18-20 week                                    | 6/1 (69)       | 0.45       | -0.43 to 1.35 | 0.31           |
| <b>Data analysis method</b>                   |                |            |               |                |
| Mixed, hierarchical, or random models [index] | 8/3 (138)      | -          | -             | -              |
| Completers                                    | 7/4 (173)      | 0.54       | -0.40 to 1.49 | 0.25           |
| Last observation carried forward (LOCF)       | 80/27 (3179)   | 0.69       | -0.08 to 1.48 | 0.08           |
| <b>Number of sites</b>                        |                |            |               |                |
| Single center [index]                         | 22/8 (228)     | -          | -             | -              |
| Multicenter                                   | 73/26 (3262)   | -0.54      | -1.11 to 0.03 | 0.06           |
| <b>Comparator</b>                             |                |            |               |                |
| Head-to-head [index]                          | 7/4 (421)      | -          | -             | -              |
| Different dose                                | 7/3 (348)      | 1.87       | 0.79 to 2.96  | 0.0007 *       |

|                                      |              |        |                 |          |
|--------------------------------------|--------------|--------|-----------------|----------|
| Placebo                              | 81/27 (2721) | 2.13   | 0.89 to 3.38    | 0.0008 * |
|                                      |              |        |                 |          |
| <b>Number of drug arms</b>           |              |        |                 |          |
| One [index]                          | 81/27 (2721) | -      | -               | -        |
| Three                                | 10/5 (563)   | 2.13   | -0.61 to 1.93   | 0.30     |
|                                      |              |        |                 |          |
| <b>Sample size at baseline</b>       | 95/34 (3490) | 0.0002 | -0.003 to 0.003 | 0.88     |
|                                      |              |        |                 |          |
| <b>Number of visits</b>              | 95/34 (3490) | 0.11   | -0.03 to 0.25   | 0.13     |
|                                      |              |        |                 |          |
| <b>Publication year</b>              | 95/34 (3490) | -0.02  | -0.07 to 0.01   | 0.21     |
|                                      |              |        |                 |          |
| <b>Baseline severity of symptoms</b> | 95/34 (3490) | 0.004  | -0.002 to 0.01  | 0.22     |

o, number of outcome measures; k, number of studies; n, sample size; SMD, standardized mean difference; GAD, generalized anxiety disorder; PTSD, post-traumatic stress disorder; SAD, social anxiety disorder; OCD, obsessive-compulsive disorder. \* Significant differences.

**Table H:** Multiple multilevel meta-regression model for placebo response on the aggregate measure of internalizing in adults and elderly

|                                               | <b>o/k (n)</b> | <b>SMD</b> | <b>95% CI</b> | <b>p-value</b> |
|-----------------------------------------------|----------------|------------|---------------|----------------|
| <b>Main disorder</b>                          |                |            |               |                |
| GAD [index]                                   | 25/13 (1777)   | -          | -             | -              |
| PTSD                                          | 26/8 (761)     | 0.28       | -0.64 to 1.21 | 0.54           |
| Panic                                         | 46/10 (959)    | 0.57       | -0.35 to 1.51 | 0.22           |
| SAD                                           | 18/8 (1101)    | 0.37       | -0.31 to 1.06 | 0.28           |
| OCD                                           | 9/3 (229)      | 0.35       | -0.78 to 1.49 | 0.54           |
| <b>Sampling</b>                               |                |            |               |                |
| Outpatients [index]                           | 100/35 (4062)  | -          | -             | -              |
| Community                                     | 4/2 (273)      | 0.18       | -0.62 to 1.00 | 0.64           |
| Mixed                                         | 4/2 (278)      | 0.13       | -0.78 to 1.06 | 0.76           |
| Unclear                                       | 16/3 (214)     | 0.05       | -0.78 to 1.24 | 0.93           |
| <b>Concomitant benzodiazepine use</b>         |                |            |               |                |
| No [index]                                    | 78/28 (3375)   | -          | -             | -              |
| Not informed                                  | 25/9 (1117)    | 0.24       | -0.35 to 0.84 | 0.41           |
| Unclear                                       | 3/1 (168)      | -0.40      | -1.72 to 0.92 | 0.55           |
| Yes                                           | 18/4 (167)     | 0.20       | -0.99 to 1.40 | 0.73           |
| <b>Placebo lead-in period</b>                 |                |            |               |                |
| No [index]                                    | 13/7 (814)     | -          | -             | -              |
| Not informed                                  | 4/2 (196)      | 0.90       | -0.60 to 2.41 | 0.24           |
| Unclear                                       | 4/1 (90)       | -0.57      | -2.04 to 0.88 | 0.43           |
| Yes                                           | 103/32 (3727)  | 0.82       | 0.18 to 1.46  | 0.01 *         |
| <b>Time medicated to outcome measure</b>      |                |            |               |                |
| 12-14 week [index]                            | 65/22 (2646)   | -          | -             | -              |
| 6-8 week                                      | 19/8 (816)     | -0.41      | -1.39 to 0.57 | 0.41           |
| 9-11 week                                     | 37/11 (1197)   | -0.45      | -1.24 to 0.34 | 0.26           |
| <b>Data analysis method</b>                   |                |            |               |                |
| Mixed, hierarchical, or random models [index] | 15/3 (361)     | -          | -             | -              |
| Last observation carried forward (LOCF)       | 103/36 (4354)  | -0.45      | -0.58 to 1.35 | 0.43           |
| Unclear                                       | 6/3 (112)      | 0.27       | -0.99 to 1.54 | 0.43           |
| <b>Study funding source</b>                   |                |            |               |                |
| Academic [index]                              | 2/1 (35)       | -          | -             | -              |
| Industry                                      | 104/35 (4243)  | 2.19       | -0.35 to 4.74 | 0.09           |
| Unclear                                       | 18/6 (549)     | 1.99       | -0.64 to 4.62 | 0.13           |
| <b>Number of sites</b>                        |                |            |               |                |
| Single center [index]                         | 9/3 (53)       | -          | -             | -              |
| Multicenter                                   | 115/39 (4774)  | -0.40      | -1.46 to 0.64 | 0.44           |



|                                      |               |        |                 |              |
|--------------------------------------|---------------|--------|-----------------|--------------|
|                                      |               |        |                 |              |
| <b>Comparator</b>                    |               |        |                 |              |
| Placebo [index]                      | 77/27 (3026)  | -      | -               | -            |
| Different dose                       | 34/11 (1208)  | 0.18   | -0.72 to 1.08   | 0.69<br>0.79 |
| Head-to-head                         | 13/4 (593)    | -0.18  | -1.58 to 1.21   |              |
|                                      |               |        |                 |              |
| <b>Number of drug arms</b>           |               |        |                 |              |
| One [index]                          | 80/27 (2972)  | -      | -               | -            |
| Two                                  | 15/7 (1053)   | -0.20  | -1.31 to 0.91   | 0.72         |
| Three                                | 29/8 (802)    | -0.58  | -1.44 to 0.28   | 0.18         |
|                                      |               |        |                 |              |
| <b>Sample size at baseline</b>       | 124/42 (4827) | -0.006 | -0.01 to -0.001 | 0.01 *       |
|                                      |               |        |                 |              |
| <b>Number of visits</b>              | 124/42 (4827) | -0.09  | -0.32 to 0.13   | 0.41         |
|                                      |               |        |                 |              |
| <b>Publication year</b>              | 124/42 (4827) | 0.02   | -0.04 to 0.10   | 0.46         |
|                                      |               |        |                 |              |
| <b>Baseline severity of symptoms</b> | 124/42 (4827) | -0.003 | -0.007 to 0.001 | 0.14         |

o, number of outcome measures; k, number of studies; n, sample size; SMD, standardized mean difference; GAD, generalized anxiety disorder; PTSD, post-traumatic stress disorder; SAD, social anxiety disorder; OCD, obsessive-compulsive disorder. \* Significant differences.

**SI Table I:** Multiple multilevel meta-regression model for placebo response on the aggregate measure of internalizing in elderly

|                                      | <b>o/k (n)</b> | <b>SMD</b> | <b>95% CI</b>  | <b>p-value</b> |
|--------------------------------------|----------------|------------|----------------|----------------|
| <b>Main disorder</b>                 |                |            |                |                |
| GAD [index]                          | 4/2 (233)      | -          | -              | -              |
| More than one anxiety disorder       | 1/1 (17)       | -1.01      | -1.89 to -0.13 | 0.02 *         |
| <b>Sampling</b>                      |                |            |                |                |
| Outpatients [index]                  | 2/1 (140)      | -          | -              | -              |
| Mixed                                | 3/2 (110)      | 0.84       | 0.48 to 1.20   | <.0001 *       |
| <b>Baseline severity of symptoms</b> |                |            |                |                |
|                                      | 5/3 (250)      | 0.01       | 0.002 to 0.02  | 0.01 *         |

o, number of outcome measures; k, number of studies; n, sample size; SMD, standardized mean difference; GAD, generalized anxiety disorder. \* Significant differences.

**SI Table J:** Multiple multilevel meta-regression model for placebo response on the aggregate measure of internalizing symptoms in children and adolescents

|                                                 | <b>o/k (n)</b> | <b>SMD</b> | <b>95% CI</b>   | <b>p-value</b> |
|-------------------------------------------------|----------------|------------|-----------------|----------------|
| <b>Main disorder</b>                            |                |            |                 |                |
| GAD [index]                                     | 7/2 (148)      | -          | -               | -              |
| PTSD                                            | 3/1(62)        | -12.98     | -28.20 to 2.22  | 0.09           |
| More than one anxiety disorder                  | 3/2(141)       | 4.89       | -0.81 to 10.61  | 0.09           |
| SAD                                             | 6/3(337)       | 35.75      | -7.46 to 78.97  | 0.10           |
| OCD                                             | 21/7(352)      | 15.6       | -2.82 to 34.08  | 0.09           |
| <b>Sampling</b>                                 |                |            |                 |                |
| Outpatients [index]                             | 32/12(954)     | -          | -               | -              |
| Community                                       | 1/1(32)        | 0.86       | -0.57 to 2.29   | 0.24           |
| Unclear                                         | 7/2(54)        | -18.15     | -39.65 to 3.34  | 0.09           |
| <b>Concomitant benzodiazepine use</b>           |                |            |                 |                |
| No [index]                                      | 19/8(620)      | -          | -               | -              |
| Not informed                                    | 21/7(420)      | -19.89     | -44.80 to 5.02  | 0.11           |
| <b>Placebo lead-in period</b>                   |                |            |                 |                |
| No [index]                                      | 29/10(674)     | -          | -               | -              |
| Not informed                                    | 3/3(208)       | -38.42     | -85.84 to 8.99  | 0.11           |
| Yes                                             | 8/2(158)       | -26.78     | -60.23 to 6.67  | 0.11           |
| <b>Time to outcome measure</b>                  |                |            |                 |                |
| 12-14 week [index]                              | 12/6(411)      | -          | -               | -              |
| 6-8 week                                        | 8/3(94)        | -21.69     | -48.46 to 5.07  | 0.11           |
| 9-11 week                                       | 16/5(378)      | -5.41      | -11.92 to 1.09  | 0.10           |
| 15-17 week                                      | 4/1(157)       | -16.08     | -36.76 to 4.60  | 0.12           |
| <b>Data analysis method</b>                     |                |            |                 |                |
| Last observation carried forward (LOCF) [index] | 35/14(1029)    | -          | -               | -              |
| Unclear                                         | 5/1(11)        | -0.32      | -1.77 to 1.11   | 0.65           |
| <b>Study funding source</b>                     |                |            |                 |                |
| Governmental or non-profit [index]              | 13/5(154)      | -          | -               | -              |
| Industry                                        | 27/10(886)     | 0.56       | -0.24 to 1.37   | 0.17           |
| <b>Sample size at baseline</b>                  |                |            |                 |                |
|                                                 | 40/15 (1040)   | -0.17      | -0.38 to 0.02   | 0.08           |
| <b>Baseline severity of symptoms</b>            |                |            |                 |                |
|                                                 | 40/15 (1040)   | 0.001      | -0.004 to 0.006 | 0.65           |

o, number of outcome measures; k, number of studies; n, sample size; SMD, standardized mean difference; GAD, generalized anxiety disorder; PTSD, post-traumatic stress disorder; SAD, social anxiety disorder; OCD, obsessive-compulsive disorder.

SITable K: Risk of bias in included studies

| <b>Id</b> | <b>Author</b>      | <b>Randomization risk of bias</b> | <b>Allocation concealment risk of bias</b> | <b>Blinding of participants and personnel risk of bias</b> | <b>Blinding of outcome assessment risk of bias</b> | <b>Attrition risk of bias</b> | <b>Reporting risk of bias</b> | <b>Other risk of bias</b> |
|-----------|--------------------|-----------------------------------|--------------------------------------------|------------------------------------------------------------|----------------------------------------------------|-------------------------------|-------------------------------|---------------------------|
| JF10      | Allgulander        | low                               | high                                       | low                                                        | low                                                | high                          | unclear                       | unclear                   |
| JF11      | Allgulander C.     | low                               | unclear                                    | low                                                        | low                                                | low                           | low                           | low                       |
| JF15      | Asakura S.         | unclear                           | unclear                                    | low                                                        | unclear                                            | low                           | low                           | low                       |
| JF16      | Asnis              | unclear                           | unclear                                    | low                                                        | unclear                                            | low                           | low                           | low                       |
| JF20      | Bakker             | unclear                           | unclear                                    | low                                                        | unclear                                            | low                           | low                           | low                       |
| JF22      | Baldwin            | low                               | unclear                                    | low                                                        | unclear                                            | low                           | low                           | low                       |
| JF25      | Baldwin D.         | unclear                           | unclear                                    | low                                                        | unclear                                            | low                           | low                           | low                       |
| JF28      | Ballenger          | unclear                           | unclear                                    | low                                                        | unclear                                            | low                           | low                           | low                       |
| JF29      | Bandelow           | low                               | low                                        | low                                                        | low                                                | low                           | low                           | low                       |
| JF3       | Alaka              | low                               | high                                       | low                                                        | unclear                                            | unclear                       | unclear                       | low                       |
| JF34      | Beidel D.C.        | unclear                           | low                                        | low                                                        | low                                                | unclear                       | unclear                       | unclear                   |
| JF42      | Birmaher           | unclear                           | unclear                                    | low                                                        | low                                                | unclear                       | low                           | low                       |
| JF45      | Black              | unclear                           | unclear                                    | low                                                        | low                                                | unclear                       | low                           | low                       |
| JF56      | Bradwejn           | unclear                           | low                                        | low                                                        | low                                                | unclear                       | low                           | low                       |
| JF59      | Brady              | unclear                           | low                                        | low                                                        | low                                                | unclear                       | low                           | low                       |
| JF61      | Brawman-Mintzer O. | low                               | low                                        | low                                                        | low                                                | unclear                       | low                           | low                       |
| JF7       | Allgulander        | unclear                           | unclear                                    | unclear                                                    | unclear                                            | low                           | low                           | unclear                   |
| JF72      | Chouinard          | unclear                           | unclear                                    | low                                                        | unclear                                            | unclear                       | low                           | low                       |
| JF78      | Connor K.M.        | unclear                           | low                                        | low                                                        | unclear                                            | unclear                       | low                           | low                       |
| JF80      | Coric              | unclear                           | unclear                                    | low                                                        | unclear                                            | unclear                       | low                           | low                       |
| JF82      | Da Costa           | unclear                           | unclear                                    | low                                                        | unclear                                            | unclear                       | low                           | low                       |
| JF83      | Dahl               | unclear                           | unclear                                    | low                                                        | unclear                                            | unclear                       | unclear                       | low                       |
| JF87      | Davidson           | unclear                           | unclear                                    | low                                                        | unclear                                            | unclear                       | unclear                       | low                       |

|             |                 |         |         |         |         |         |         |         |
|-------------|-----------------|---------|---------|---------|---------|---------|---------|---------|
| <b>JF88</b> | Davidson        | unclear | unclear | low     | unclear | unclear | unclear | low     |
| <b>JF89</b> | Davidson        | unclear | unclear | low     | unclear | high    | low     | low     |
| <b>JF9</b>  | Koponen         | low     | unclear | low     | unclear | high    | high    | low     |
| <b>JF94</b> | Asakura S.      | low     | high    | low     | unclear | low     | low     | low     |
| <b>LM10</b> | Den Boer        | unclear | unclear | unclear | unclear | low     | high    | unclear |
| <b>LM23</b> | Fani N.         | unclear | unclear | unclear | high    | low     | low     | low     |
| <b>LM24</b> | Fani N.         | unclear | unclear | unclear | high    | low     | low     | low     |
| <b>LM34</b> | Friedman M.J.   | unclear | low     | low     | unclear | low     | low     | low     |
| <b>LM37</b> | Gelenberg       | low     | low     | unclear | unclear | low     | high    | low     |
| <b>LM39</b> | Geller D.A.     | unclear | unclear | unclear | unclear | low     | low     | low     |
| <b>LM4</b>  | Davidson J.     | low     | low     | unclear | unclear | low     | low     | unclear |
| <b>LM40</b> | Geller D.A.     | low     | low     | unclear | unclear | low     | high    | low     |
| <b>LM42</b> | Gimenez M.      | unclear | unclear | unclear | unclear | low     | high    | high    |
| <b>LM48</b> | Goodman W.K.    | unclear | unclear | unclear | unclear | low     | high    | high    |
| <b>LM5</b>  | Davidson J.R.T. | low     | low     | high    | high    | low     | low     | low     |
| <b>LM50</b> | Greist          | unclear | unclear | unclear | unclear | low     | high    | high    |
| <b>LM54</b> | Hartford        | unclear | unclear | unclear | unclear | low     | low     | low     |
| <b>LM57</b> | Hertzberg       | unclear | unclear | unclear | unclear | low     | unclear | unclear |
| <b>LM59</b> | Hoehn-Saric     | unclear | unclear | unclear | unclear | high    | high    | high    |
| <b>LM6</b>  | Davidson J.R.T. | unclear | low     | unclear | unclear | low     | high    | unclear |
| <b>LM60</b> | Hollander       | unclear | unclear | unclear | unclear | high    | low     | low     |
| <b>LM67</b> | Jenike          | unclear | unclear | unclear | unclear | low     | low     | low     |
| <b>LM69</b> | Jenike M.A.     | unclear | unclear | low     | low     | high    | low     | low     |
| <b>LM71</b> | Kamijima K.     | unclear | unclear | unclear | unclear | high    | high    | high    |
| <b>LM72</b> | Kasper          | low     | unclear | unclear | unclear | low     | low     | low     |
| <b>LM73</b> | Kasper          | unclear | unclear | unclear | unclear | unclear | high    | unclear |
| <b>LM74</b> | Kasper S.       | low     |
| <b>LM76</b> | Katzelnick D.J. | unclear | unclear | unclear | unclear | high    | high    | low     |
| <b>LM86</b> | Koszycki        | low     | low     | low     | low     | low     | low     | unclear |

|              |                 |         |         |     |     |         |      |      |
|--------------|-----------------|---------|---------|-----|-----|---------|------|------|
| <b>LM95</b>  | Li              | low     | low     | low | low | low     | low  | low  |
| <b>MC1</b>   | Ledley          | unclear | unclear | low | low | high    | high | low  |
| <b>MC10</b>  | Lepola          | unclear | unclear | low | low | high    | high | low  |
| <b>MC12</b>  | Liebowitz       | unclear | unclear | low | low | low     | low  | low  |
| <b>MC13</b>  | Liebowitz       | unclear | unclear | low | low | low     | low  | low  |
| <b>MC14</b>  | Liebowitz       | unclear | unclear | low | low | low     | high | high |
| <b>MC15</b>  | Liebowitz       | unclear | unclear | low | low | low     | low  | high |
| <b>MC16</b>  | Liebowitz       | unclear | unclear | low | low | low     | low  | low  |
| <b>MC17</b>  | Liebowitz M.R.  | unclear | unclear | low | low | high    | high | low  |
| <b>MC2</b>   | Leinonen        | unclear | unclear | low | low | high    | high | low  |
| <b>MC20a</b> | Londborg P.D.   | low     | unclear | low | low | low     | high | high |
| <b>MC20b</b> | Londborg P.D.   | low     | unclear | low | low | low     | high | high |
| <b>MC22</b>  | Mahableshwarkar | low     | unclear | low | low | high    | high | high |
| <b>MC25</b>  | March           | low     | low     | low | low | low     | low  | low  |
| <b>MC26</b>  | March           | low     | low     | low | low | high    | low  | low  |
| <b>MC28</b>  | March J.S.      | low     | low     | low | low | high    | low  | low  |
| <b>MC3</b>   | Lenox-Smith     | low     | low     | low | low | high    | high | low  |
| <b>MC31</b>  | Marshall        | unclear | unclear | low | low | low     | low  | low  |
| <b>MC32</b>  | Marshall        | unclear | unclear | low | low | high    | low  | low  |
| <b>MC33</b>  | Martenyi        | unclear | unclear | low | low | high    | low  | low  |
| <b>MC34</b>  | Martenyi        | unclear | low     | low | low | low     | low  | low  |
| <b>MC38</b>  | Merideth        | low     | unclear | low | low | high    | low  | low  |
| <b>MC39</b>  | Michelson       | unclear | unclear | low | low | unclear | high | low  |
| <b>MC4</b>   | Lenze           | low     | low     | low | low | high    | high | low  |
| <b>MC40</b>  | Michelson D.    | unclear | unclear | low | low | high    | low  | low  |
| <b>MC42</b>  | Montgomery      | unclear | unclear | low | low | low     | low  | low  |
| <b>MC44</b>  | Montgomery      | unclear | unclear | low | low | high    | low  | low  |
| <b>MC45</b>  | Montgomery      | unclear | unclear | low | low | low     | low  | low  |
| <b>MC51</b>  | Nair            | unclear | unclear | low | low | low     | high | low  |

|             |                    |         |         |     |         |         |      |         |
|-------------|--------------------|---------|---------|-----|---------|---------|------|---------|
| <b>MC55</b> | Nicolini           | low     | low     | low | low     | high    | high | low     |
| <b>MC56</b> | Nimatoudis I.      | unclear | unclear | low | low     | low     | low  | high    |
| <b>MC6</b>  | Lenze              | low     | low     | low | low     | low     | low  | low     |
| <b>MC62</b> | Panahi             | unclear | low     | low | low     | high    | low  | low     |
| <b>MC73</b> | Pollack            | unclear | unclear | low | low     | high    | low  | low     |
| <b>MC77</b> | Pollack            | unclear | unclear | low | low     | low     | high | low     |
| <b>MC79</b> | Pollack            | unclear | unclear | low | low     | high    | low  | low     |
| <b>MC81</b> | Pollack            | unclear | unclear | low | low     | high    | low  | low     |
| <b>MC82</b> | Pollack M.H.       | unclear | unclear | low | low     | low     | low  | low     |
| <b>MJ1</b>  | Rickels            | unclear | unclear | low | unclear | high    | high | unclear |
| <b>MJ14</b> | Rynn               | unclear | unclear | low | unclear | high    | low  | low     |
| <b>MJ16</b> | Rynn M.A.          | unclear | unclear | low | unclear | high    | low  | low     |
| <b>MJ17</b> | Sandmann J.        | unclear | unclear | low | unclear | high    | high | low     |
| <b>MJ2</b>  | Rickels            | unclear | unclear | low | low     | high    | low  | low     |
| <b>MJ22</b> | Sharp D.M.         | unclear | unclear | low | unclear | low     | high | low     |
| <b>MJ25</b> | Sheehan            | unclear | unclear | low | unclear | high    | low  | low     |
| <b>MJ3</b>  | Rickels K.         | unclear | unclear | low | unclear | low     | low  | low     |
| <b>MJ36</b> | Stahl              | unclear | unclear | low | unclear | low     | low  | low     |
| <b>MJ4</b>  | Riddle             | unclear | unclear | low | low     | high    | high | high    |
| <b>MJ42</b> | Stein              | low     | unclear | low | unclear | high    | high | low     |
| <b>MJ44</b> | Stein              | low     | low     | low | unclear | low     | low  | low     |
| <b>MJ5</b>  | Riddle M.A.        | unclear | unclear | low | unclear | high    | low  | low     |
| <b>MJ53</b> | Stein M.B.         | unclear | unclear | low | unclear | low     | high | unclear |
| <b>MJ54</b> | Stein M.B.         | low     | low     | low | unclear | high    | low  | low     |
| <b>MJ56</b> | Strawn             | unclear | low     | low | unclear | low     | low  | low     |
| <b>MJ6</b>  | Robb A.S.          | unclear | unclear | low | unclear | high    | low  | low     |
| <b>MJ64</b> | Tucker             | unclear | unclear | low | unclear | unclear | low  | low     |
| <b>MJ66</b> | Tucker P.          | unclear | unclear | low | unclear | low     | low  | low     |
| <b>MJ70</b> | Van Ameringen M.A. | unclear | unclear | low | unclear | high    | high | low     |

|              |                |         |         |         |         |         |         |         |
|--------------|----------------|---------|---------|---------|---------|---------|---------|---------|
| <b>MJ71</b>  | Van Der Kolk   | low     | unclear | low     | unclear | high    | high    | unclear |
| <b>MJ73</b>  | Van Vliet I.M. | unclear | unclear | low     | unclear | high    | high    | unclear |
| <b>MJ77</b>  | Wade           | unclear | unclear | low     | unclear | low     | high    | unclear |
| <b>MJ78</b>  | Wagner         | low     | unclear | low     | unclear | high    | low     | low     |
| <b>MJ79</b>  | Walkup         | low     | low     | low     | unclear | high    | low     | high    |
| <b>MJ80</b>  | Walkup         | unclear | unclear | low     | unclear | high    | high    | unclear |
| <b>MJ84</b>  | Westenberg     | unclear | unclear | low     | unclear | high    | low     | low     |
| <b>MJ85</b>  | Westenberg     | unclear | unclear | low     | unclear | high    | high    | unclear |
| <b>MJ89</b>  | Wu             | unclear | unclear | low     | unclear | high    | low     | low     |
| <b>MJ93</b>  | Zohar          | unclear | unclear | low     | unclear | low     | low     | low     |
| <b>MJ94</b>  | Zohar          | unclear | unclear | low     | unclear | high    | low     | low     |
| <b>MJ96</b>  | Stein D.J.     | low     | low     | low     | unclear | low     | high    | low     |
| <b>MJ97</b>  | Jenike         | high    | high    | low     | unclear | high    | low     | high    |
| <b>UNG1</b>  | unknown        | unclear | unclear | low     | unclear | unclear | unclear | low     |
| <b>UNG10</b> | unknown        | unclear |
| <b>UNG11</b> | unknown        | unclear |
| <b>UNG12</b> | unknown        | unclear |
| <b>UNG17</b> | unknown        | unclear |
| <b>UNG2</b>  | unknown        | unclear | unclear | low     | unclear | unclear | unclear | low     |
| <b>UNG3</b>  | unknown        | unclear |
| <b>UNG6</b>  | Hewett         | unclear |
| <b>UNG7</b>  | unknown        | unclear |
| <b>UNG8</b>  | Sonne          | low     | unclear | unclear | unclear | unclear | unclear | unclear |
| <b>UNG9</b>  | unknown        | unclear |
| <b>UPD3</b>  | Liebowitz MR   | unclear | unclear | low     | low     | low     | low     | unclear |
| <b>UPD8</b>  | Strawn JR      | low     |



**S1 Fig. B: Risk of bias summary**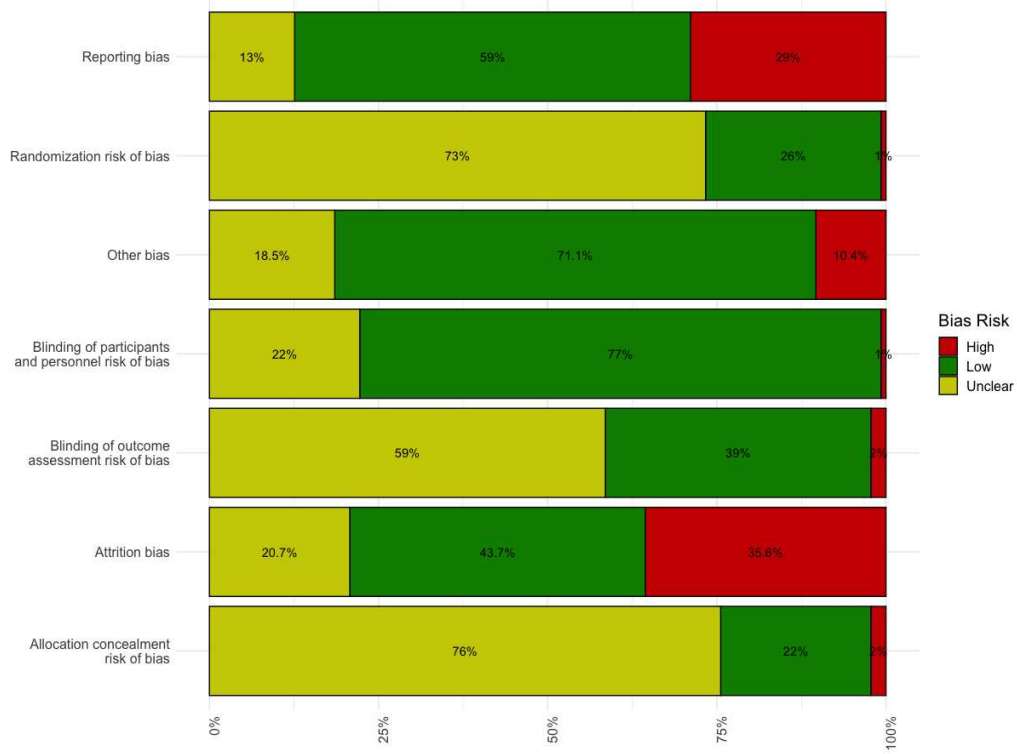

**S1 Fig. C:** Funnel plot for all symptoms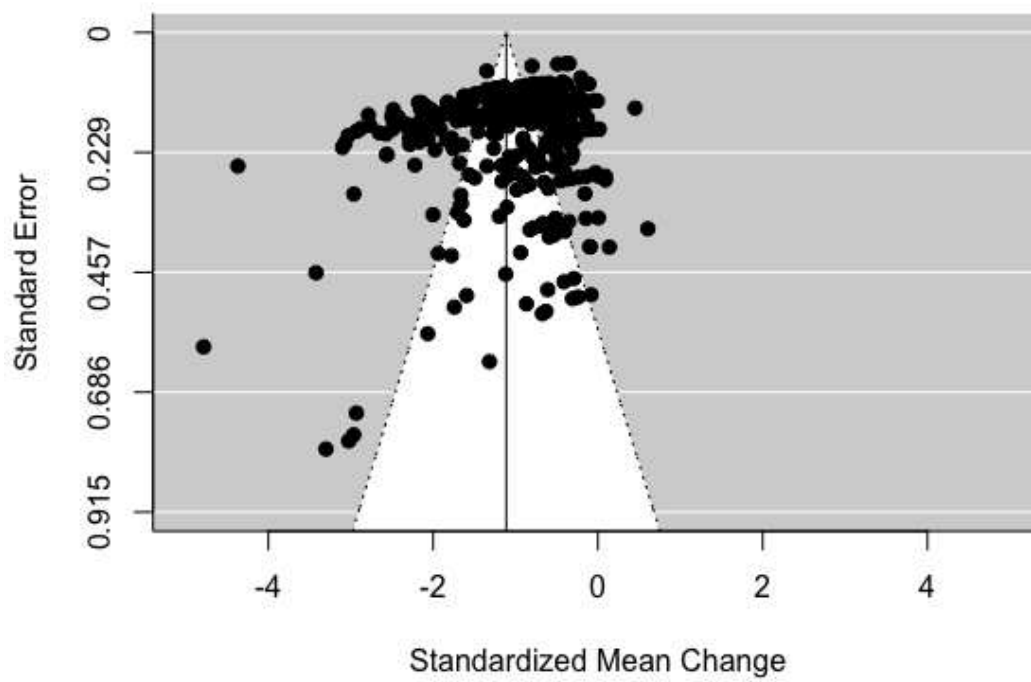

Supplement: bmjment-2022-300630supp001_data_supplement.pdf [file bmjment-2022-300630supp001_data_supplement.pdf]
